# 1 Unique ATP-cone-driven allosteric regulation of ribonucleotide 2 reductase via the radical-generating subunit

3 **Inna Rozman Grinberg<sup>1</sup>, Daniel Lundin<sup>1</sup>, Mahmudul Hasan<sup>1,2,#</sup>, Mikael Crona<sup>3,#</sup>,**  
4 **Venkateswara Rao Jonna<sup>4,#</sup>, Christoph Loderer<sup>1</sup>, Margareta Sahlin<sup>1</sup>, Natalia Markova<sup>5</sup>,**  
5 **Ilya Borovok<sup>6</sup>, Gustav Berggren<sup>7</sup>, Anders Hofer<sup>4</sup>, Derek T Logan<sup>2,\*</sup> and Britt-Marie**  
6 **Sjöberg<sup>1,\*</sup>**

7 <sup>1</sup>Department of Biochemistry and Biophysics, Stockholm University, Sweden, <sup>2</sup>Department of  
8 Biochemistry and Structural Biology, Lund University, Sweden, <sup>3</sup>Swedish Orphan Biovitrum  
9 AB, Stockholm, Sweden, <sup>4</sup>Department of Medical Biochemistry and Biophysics, Umeå  
10 University, Sweden, <sup>5</sup>Malvern Instruments Inc., Sweden, <sup>6</sup>Department of Molecular  
11 Microbiology and Biotechnology, Tel-Aviv University, Israel, and <sup>7</sup>Department of Chemistry,  
12 Uppsala University. Sweden.

13 #These authors contributed equally

14 \*Corresponding authors

## 15 Abstract

16 Ribonucleotide reductases (RNRs) are key enzymes in DNA synthesis and repair, with  
17 sophisticated allosteric mechanisms controlling both substrate specificity and overall activity.  
18 In RNRs, the activity master-switch, the ATP-cone, has been found exclusively in the  
19 catalytic subunit. In two class I RNR subclasses whose catalytic subunit lacks the ATP-cone,  
20 we discovered ATP-cones in the radical-generating subunit. The ATP-cone in the  
21 *Leewenhoekiella blandensis* radical-generating subunit regulates activity via modifications of  
22 quaternary structure induced by binding of nucleotides. ATP induces enzymatically  
23 competent dimers, whereas dATP induces non-productive tetramers, resulting in different  
24 holoenzyme complexes. The tetramer forms solely by interactions between ATP-cones, as  
25 evidenced by a 2.45 Å crystal structure. We also present evidence for an Mn<sup>III</sup>Mn<sup>IV</sup> metal  
26 center. In summary, lack of an ATP-cone domain in the catalytic subunit was compensated  
27 by evolutionary capture of the domain by the radical-generating subunit. Our findings present  
28 a novel opportunity for dATP-regulation of engineered proteins.

29

## 30 Introduction

31 Allosteric regulation of an enzyme is defined as regulation of activity by binding of an effector  
32 molecule to a different location of the enzyme than the active site. The effector influences  
33 the distribution of tertiary or quaternary conformations of an enzyme, alone or in  
34 combination, modulating its activity (Swain & Gierasch, 2006). Allostery is an intrinsic  
35 property of many, if not all, dynamic proteins (Gunasekaran, Ma, & Nussinov, 2004) and an  
36 important factor in disease (Nussinov & Tsai, 2013), and has hence attracted considerable  
37 scientific interest. A substantial part of this interest has been focused on ribonucleotide  
38 reductase (RNR), which has been termed a “paradigm for allosteric regulation of enzymes”  
39 (Aravind, Wolf, & Koonin, 2000).

40 RNRs are essential enzymes in all free-living cells, providing the only known *de novo*  
41 pathway for the biosynthesis of deoxyribonucleotides (dNTPs), the immediate precursors for  
42 DNA synthesis and repair (Hofer, Crona, Logan, & Sjöberg, 2012; Nordlund & Reichard,  
43 2006). To avoid misbalanced levels of dNTPs and the increased mutation rates that are the  
44 inevitable consequences of this (Kumar et al., 2011; Mathews, 2006; Watt, Buckland, Lujan,  
45 Kunkel, & Chabes, 2016), RNRs are tightly controlled through transcriptional and allosteric  
46 regulation, subcellular compartmentalization and small protein inhibitors (Pai & Kearsey,  
47 2017; Torrents, 2014). Allosteric regulation of RNRs affects both substrate specificity and  
48 overall activity. The specificity regulation has been intensively studied and described for all  
49 three classes of RNRs (Andersson, Westman, Hofer, & Sjöberg, 2000; Hofer et al., 2012;  
50 Larsson et al., 2004; Reichard, 2010; Torrents et al., 2000; Zimanyi, Chen, Kang, Funk, &  
51 Drennan, 2016). The s-site binds dNTPs and determines which nucleotide will be reduced at  
52 the active site to ensure balanced levels of the four dNTPs in the cell. Additionally, many  
53 RNRs possess an overall activity regulation site (a-site) (Brown & Reichard, 1969; Thelander  
54 & Reichard, 1979) positioned in an N-terminal domain of ~100 amino acid residues called  
55 the ATP-cone (Aravind et al., 2000; Eriksson et al., 1997). Acting as a regulatory master  
56 switch, the a-site senses intracellular nucleotide concentrations by competitive binding of  
57 ATP and dATP. In presence of ATP the enzyme is active, and when concentrations of  
58 dNTPs rise, binding of dATP switches the enzyme off. This mechanism ensures sufficient  
59 but not excessive amounts of nucleotides that may also cause increased mutation rates  
60 (Mathews, 2006).

61 To date, ATP-cone domains in RNRs have been observed exclusively at the N-terminus of  
62 the catalytic subunit NrdA (class I), NrdJ (class II) and NrdD (class III). Class I RNRs consist  
63 of a large, catalytic subunit ( $\alpha$  or NrdA), and a smaller, radical-generating subunit ( $\beta$  or NrdB)  
64 (Huang, Parker, & Stubbe, 2014; Nordlund & Reichard, 2006). NrdA and NrdB interact to  
65 form the active complex, in which the two proteins need to be precisely positioned such that  
66 the radical can be transferred from NrdB, where it is generated and stored, to NrdA where it  
67 starts the substrate reduction. In class I, it has long been noted that ATP-cones are absent  
68 from subclass Ib (NrdE) but present in several, but not all, NrdAs. A recent phylogenetic  
69 subclassification of RNRs reveals that three phylogenetically well-supported subclasses of  
70 class I never have ATP-cones (Jonna et al., 2015) (<http://rnrdB.pfitmap.org>): NrdE, NrdAi  
71 and NrdAk. In two of these subclasses we instead discovered ATP-cones attached to their  
72 corresponding radical-generating subunit: NrdF (the Ib subclass) and NrdBi. It hence  
73 appears as if the lack of activity regulation through an ATP-cone in the catalytic subunit is

74 compensated by the presence of this domain in the non-homologous radical-generating  
75 subunit of some RNRs.

76 Three distinct types of class I complexes have been mechanistically characterized and found  
77 to operate via nucleotide-induced regulation of quaternary structure (Johansson et al., 2016;  
78 Jonna et al., 2015; Kashlan, Scott, Lear, & Cooperman, 2002; Rofougaran, Crona, Vodnala,  
79 Sjöberg, & Hofer, 2008; Rofougaran, Vodnala, & Hofer, 2006; Torrents, Westman, Sahlin, &  
80 Sjöberg, 2006). Crystal structures, cryo-electron microscopy reconstructions and small-angle  
81 X-ray scattering studies of inhibited complexes have revealed that when dATP is bound at  
82 the a-site, high molecular mass oligomers are formed, in which the radical transfer pathway  
83 is distorted (Ando et al., 2011; Ando et al., 2016; Fairman et al., 2011; Johansson et al.,  
84 2016). Conversely, when ATP is bound, an active enzyme complex is formed. Interestingly,  
85 the structure and organization of subunits in active and inactive complexes varies  
86 considerably between species (Ahmad & Dealwis, 2013; Hofer et al., 2012). In *Escherichia*  
87 *coli* RNR, the active NrdAB complex is  $\alpha_2\beta_2$ , whereas the inactive form is an  $\alpha_4\beta_4$  ring-  
88 shaped octamer where the ATP-cones in the  $\alpha$  subunits interact with the  $\beta$  subunits (Ando et  
89 al., 2011). In the eukaryotic class I RNR, the inactive complex differs from *E. coli* in that it  
90 has an  $\alpha_6$  stoichiometry. This hexamer can only bind one  $\beta_2$  subunit in an unproductive  
91 manner without a properly aligned electron transport chain (Fairman et al., 2011). Activation  
92 by ATP creates a different type of  $\alpha_6$  complex that binds one or more  $\beta_2$  complexes (Ando et  
93 al., 2016; Aye & Stubbe, 2011; Crona et al., 2013; Fairman et al., 2011; Rofougaran et al.,  
94 2006). The different complexes are formed by subtle changes at the a-site induced by  
95 binding of the different nucleotides (Fairman et al., 2011). Another oligomerization  
96 mechanism has been recently found in *Pseudomonas aeruginosa* class I RNR, which  
97 possesses two consecutive ATP-cones, of which only the N-terminal one binds nucleotides.  
98 The active complex is once again  $\alpha_2\beta_2$ , but the inactive *P. aeruginosa* RNR complex is a  
99 dATP-induced  $\alpha_4$  complex consisting of a ring of four  $\alpha$  subunits interacting via their outer  
100 ATP-cones (Johansson et al., 2016; Jonna et al., 2015). A single  $\beta_2$  can bind to this ring, but  
101 the complex is inactive.

102 The unexpected finding of an ATP-cone fused to the radical-generating subunits poses  
103 questions regarding how it might regulate activity. Here we describe the mechanism of  
104 activity regulation by the ATP-cone N-terminally fused to the radical-generating NrdBi from  
105 *Leeuwenhoekiella blandensis* strain MED217. *L. blandensis* was isolated from  
106 Mediterranean surface seawater and belongs to Flavobacteriaceae, the major family of  
107 marine Bacteroidetes, with important roles in carbon flow and nutrient turnover in the sea  
108 during and following algal blooms (Fernandez-Gomez et al., 2013; Pinhassi et al., 2006). *L.*  
109 *blandensis* possesses two RNRs: a class II without ATP-cone, and the class I NrdAi/NrdBi,  
110 which lacks an ATP-cone in NrdA and instead contains an ATP-cone positioned at the N-  
111 terminus of NrdB. Superficially, the allosteric mechanism of *L. blandensis* NrdAi/NrdBi  
112 holoenzyme is similar to when the ATP-cone is contained in the catalytic subunit. At high  
113 dATP concentrations, inhibited higher oligomeric complexes of the holoenzyme are  
114 favoured. However, in the *L. blandensis* class I RNR, the oligomerization is driven by a shift  
115 towards tetramers of the radical-generating subunit. This illustrates how allosteric regulation  
116 controlled by ATP-cones can evolve in a highly dynamic way, requiring few adaptations to  
117 the core of the enzyme. The relative ease by which ATP-cone-driven activity regulation  
118 appears to evolve, provides a potential route to regulate engineered enzymes by dATP-  
119 inhibition.

## 120 Results

### 121 The activity allosteric regulatory ATP-cone is linked to the 122 radical-containing subunit in some class I RNRs

123 We detected ATP-cones in the radical-generating subunits of RNRs from two distinct  
124 phylogenetic RNR subclasses: NrdBi and NrdF (Fig. 1a). In the NrdBi sequences, the ATP-  
125 cone was found at the N-terminus of the protein, whereas it was found at the C-terminus of  
126 the NrdF proteins (Fig. 1b). Interestingly, the corresponding catalytic subunit subclasses –  
127 NrdAi and NrdE respectively – have been found to lack ATP-cones. Ninety-three sequences  
128 in NCBI's RefSeq database are NrdBi proteins with N-terminally positioned ATP-cones. They  
129 are encoded by viruses and bacteria from several phyla, although the Flavobacteriales order  
130 in the Bacteroidetes phylum predominate (70 sequences, <http://rnrdB.pfitmap.org>). NrdF  
131 proteins with a C-terminally positioned ATP-cone are only encoded by four species of the  
132 *Meiothermus* genus of the Deinococcus-Thermus phylum (<http://rnrdB.pfitmap.org>). All  
133 species encoding NrdB proteins with ATP-cones in their genomes also encode other RNRs.

134

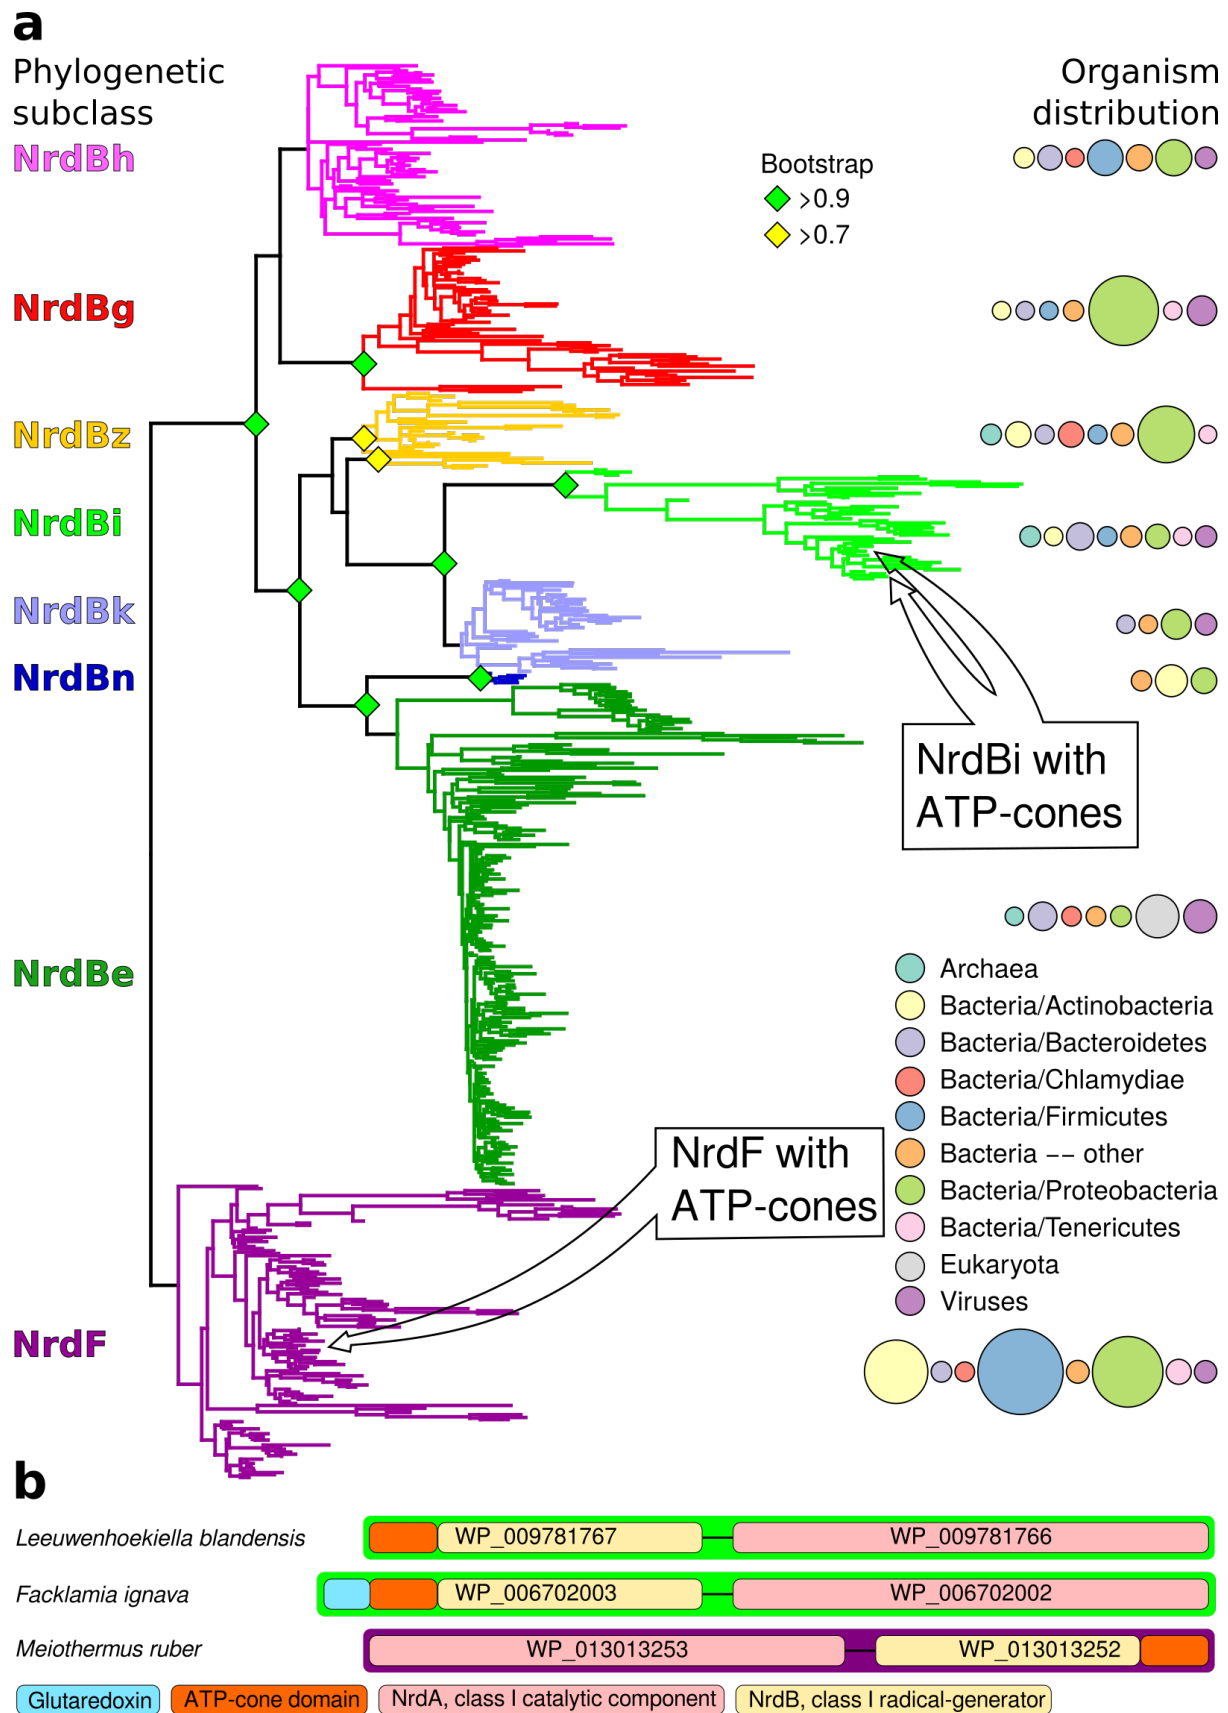

135

136

137

138

**Figure 1. Unrooted phylogenetic tree of NrdB sequences and genome arrangements of NrdB sequences with ATP-cones.** a) Maximum likelihood phylogeny of class I RNR radical generating subunit with subclasses in color, names to the left and organism

139 distributions to the right (see inset legend; sizes of circles are proportional to the number of  
140 sequences found in each taxon). Bootstrap support values greater than 0.7 are shown with  
141 colored diamonds. NrdBs with ATP-cones were discovered in two subclasses: NrdBi and  
142 NrdF (formerly class Ib). Neither of the two subclasses have corresponding catalytic  
143 subunits, NrdAi and NrdE respectively, with ATP-cones. In both subclasses, NrdB  
144 sequences with ATP-cones were rare and phylogenetically limited, see inset arrows. b)  
145 Arrangement of class I RNR genes in three genomes encoding NrdB proteins with ATP-  
146 cones (*green borders*, NrdAi/NrdBi; *purple borders*, NrdE/NrdF). Genes are shown 5' to 3',  
147 so that ATP-cones in the N-terminus are to the left in the gene.

148

## 149 Substrate specificity regulation of *L. blandensis* RNR via the s- 150 site

151 Initially we cloned, expressed and purified the *L. blandensis* NrdBi and NrdAi proteins. Using  
152 a four-substrate activity assay in the presence of saturating concentrations of the s-site  
153 effectors dTTP, dGTP or ATP, we found that *L. blandensis* RNR has a similar specificity  
154 regulation pattern to most characterized RNRs (Hofer et al., 2012). ATP stimulated the  
155 reduction of CDP and UDP, whereas dTTP stimulated the reduction of GDP, and dGTP  
156 stimulated the reduction of ADP and GDP (Fig. 2). The enzyme was completely inactive  
157 in the absence of allosteric effectors. Using mixtures of allosteric effectors, we observed that  
158 dTTP-induced GDP reduction dramatically increased in the presence of ATP (Fig. 2).

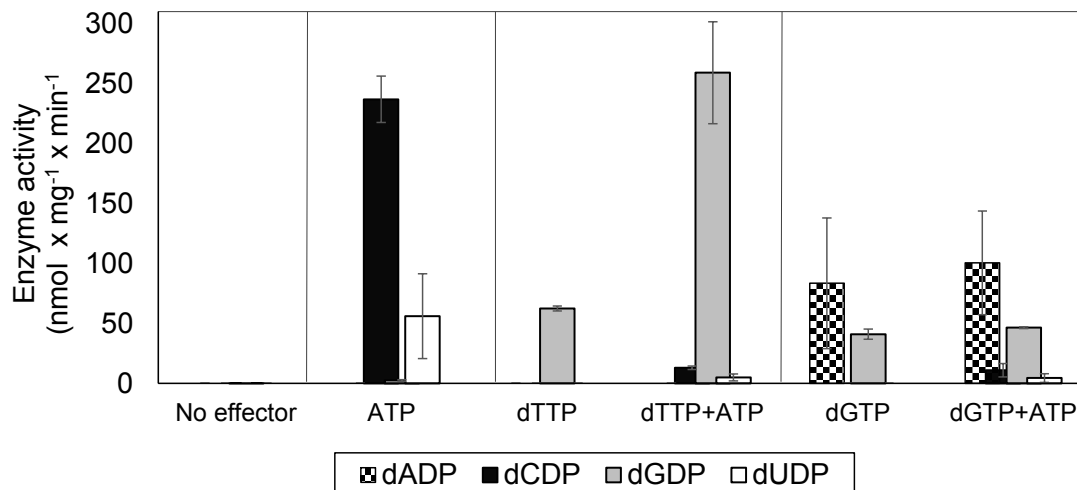

159

160 **Figure 2: Allosteric specificity regulation of the *L. blandensis* class I RNR.** Enzyme  
161 activity was measured after 10 and 30 min in the presence of all four substrates (0.5 mM  
162 each) and with the indicated allosteric effectors (2 mM of each). Error bars indicate the  
163 extremes of two measurements. Protein concentrations were 1  $\mu$ M NrdB and 4  $\mu$ M NrdA.

164

165

## 166 Overall activity of *L. blandensis* RNR is regulated via the NrdB- 167 linked ATP-cone

168 We performed a series of activity assays with CDP as substrate to elucidate the potential  
169 roles of ATP and dATP in activating and inhibiting the enzyme (Fig. 3). The presence of ATP  
170 clearly activated the enzyme (Fig. 3a), while dATP activated the enzyme when used at low  
171 concentrations and was inhibitory at 30  $\mu$ M and higher (Fig. 3b). An ATP-cone deletion  
172 mutant NrdB $\Delta$ 99, lacking the N-terminal 99 residues, reached a lower maximum activity  
173 compared to the wild type enzyme, suggesting that it was not activated by ATP beyond  
174 saturation of the s-site in the NrdA, nor was it inhibited by dATP (Fig. 3a-b). From the  
175 NrdB $\Delta$ 99 effector titrations, we could calculate  $K_L$  values – the concentrations of allosteric  
176 effectors that give half maximal enzyme activity – for binding of ATP and dATP to the s-site  
177 in NrdA to 30 and 1.4  $\mu$ M respectively. Titration of ATP into wild type NrdB in the presence  
178 of an excess of NrdA saturated with dTTP showed that it activates the enzyme through the  
179 a-site with a  $K_L$  of 96  $\mu$ M (Fig. 3c). For the corresponding inhibition by dATP binding to the a-  
180 site, we calculated the  $K_i$  value - the binding constant of a non-competitive inhibitor - to be 20  
181  $\mu$ M in the presence of an s-site saturating dTTP concentration (Fig. 3d). We also tested if  
182 only the triphosphate form of (deoxy)adenosine nucleotides would interact with the a-site in  
183 presence of s-site saturating dTTP concentrations. In addition to ATP and dATP, dADP was  
184 also found to interact, whereas ADP, AMP and dAMP had no effect (Fig. 3e). Titration with  
185 dADP inhibited the enzyme activity, although less strongly than dATP (Fig. 3f).

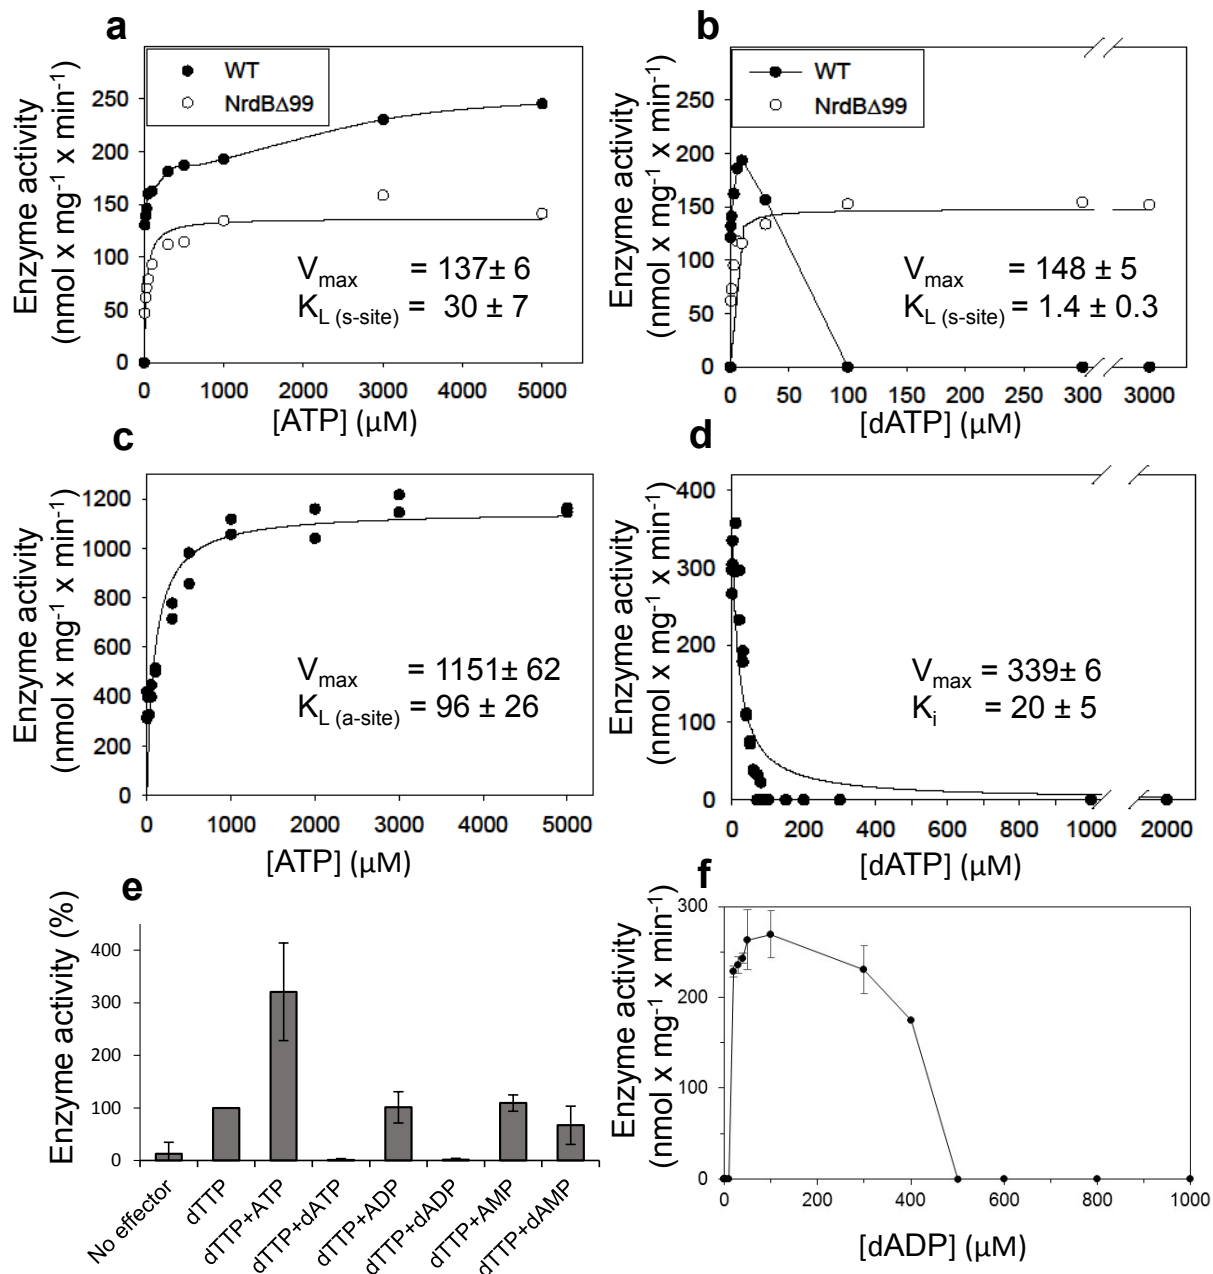

186

187 **Figure 3: Activity of *L. blandensis* RNR with wild type NrdB or NrdBΔ99 in the**

188 **presence of allosteric effectors.** NrdB was used in excess over NrdA when studying the s-

189 s-site and NrdA was used in excess when studying the a-site. a-b) CDP reduction assayed in

190 mixtures of 0.5 μM NrdA and 2 μM of either wild type NrdB (black circles) or NrdBΔ99 (white

191 circles), titrated with ATP (a) or dATP (b). c) GDP reduction assay mixtures with 2 μM NrdA

192 and 0.5 μM wild type NrdB titrated with ATP in the presence of an s-site saturating

193 concentration of dTTP (2 mM). d) Reduction of GDP assayed with 2 μM NrdA and 0.5 μM

194 wild type NrdB, titrated with dATP in the presence of an s-site saturating concentration of

195 dTTP (2 mM). e) GDP reduction in presence of s-site saturating dTTP (2 mM) and 2 mM of

196 the indicated adenosine nucleotides. Assay mixtures contained 4 μM NrdA and 1 μM NrdB.

197 100% activity corresponded to 639 nmol x mg<sup>-1</sup> x min<sup>-1</sup>. f) CDP reduction assays titrated with

198 dADP. Assay mixtures contained 2 μM NrdA and 0.5 μM NrdB. Error bars in panels E and F

199 indicate the standard deviation of three measurements.



200

## 201 dATP binding to NrdB induces formation of higher oligomeric 202 complexes

203 To elucidate the mechanism of allosteric overall activity regulation governed by the NrdB-  
204 linked ATP-cone, activity-independent oligomer-distribution experiments were performed by  
205 gas-phase electrophoretic macromolecule analysis (GEMMA). In the absence of allosteric  
206 effectors, NrdB ( $\beta$ ) is mainly monomeric (theoretically 51.8 kDa) and in contrast to most  
207 studied NrdB proteins it does not readily form dimers at the low protein concentration range  
208 suitable for GEMMA analyses (Fig. 4a). Addition of dATP (50  $\mu$ M) dramatically shifted the  
209 equilibrium towards tetramers  $\beta_4$ , which became the major form under these conditions (Fig.  
210 4a). Titration of increasing concentrations of dATP to NrdB showed that the tetramers  
211 reached their half-maximum mass concentration at around 10  $\mu$ M dATP (Supplementary Fig.  
212 S1). Addition of 50  $\mu$ M dADP also induced formation of NrdB tetramers (Fig. 4a). The  
213 NrdB $\Delta$ 99 mutant, lacking the ATP-cone (Fig. 4b), was in contrast mainly monomeric  
214 regardless if dATP was present or not (Fig. 4b), demonstrating that the NrdB-linked ATP-  
215 cone is required for dATP-induced tetramer formation. NrdA was a monomer (theoretically  
216 70.6 kDa) in the absence of allosteric effectors, while addition of dATP prompted formation  
217 of dimers (Fig. 4c) To assess the oligomeric state of the complete enzymatic complex of the  
218 inactive *L. blandensis* RNR, a mixture of NrdA ( $\alpha$ ) and NrdB ( $\beta$ ) in the presence of 100  $\mu$ M  
219 dATP was analyzed with GEMMA (Fig. 4c). The two subunits formed a large complex of 340  
220 kDa with the expected mass of an  $\alpha_2\beta_4$  complex (theoretically 348 kDa), and at higher  
221 protein concentration a complex of 465 kDa with the expected mass of an  $\alpha_4\beta_4$  complex  
222 (theoretically 488 kDa).

223

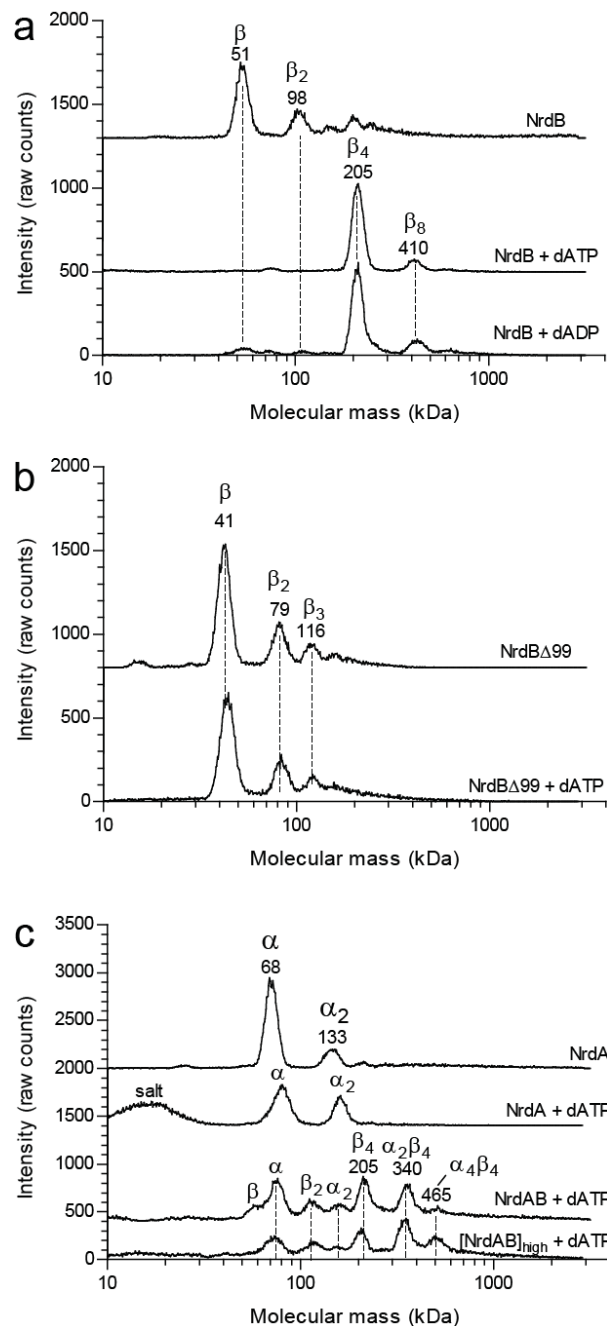

224

225 **Figure 4: GEMMA analysis of the *L. blandensis* RNR subunits  $\alpha$ ,  $\beta$  and their**  
 226 **combinations in the presence and the absence of allosteric effectors.** a) 0.1 mg/ml  
 227 NrdB ( $\sim 2 \mu\text{M}$ ) analyzed in the absence and presence of 50  $\mu\text{M}$  dATP or dADP. b) The  
 228 NrdB $\Delta$ 99 mutant analyzed in the absence and the presence of 50  $\mu\text{M}$  dATP. c) In the top  
 229 two traces 0.1 mg/ml NrdA ( $\sim 1.4 \mu\text{M}$ ) is analyzed in the absence or presence of 100  $\mu\text{M}$   
 230 dATP. In the third trace, 0.1 mg/ml NrdB is added to the mixture. The last trace is similar to  
 231 the third trace, but the concentration of NrdA and NrdB is increased to 0.4 mg/ml NrdA and  
 232 0.3 mg/ml NrdB ( $\sim 6 \mu\text{M}$  of each). The analyses of NrdA-NrdB complexes were performed at  
 233 a very low pressure (1.4 Psi) to avoid the influence of magnesium-nucleotide clusters on the  
 234 measurement and to minimize the risk of false protein-protein interactions. The baselines of  
 235 the individual experiments are distributed in the vertical direction to be able to fit many traces  
 236 in each panel.

237

238 To complement the GEMMA analyses of oligomer formation, we performed analytical size  
 239 exclusion chromatography (SEC) using higher protein concentrations and physiologically  
 240 reasonable concentrations of effectors (3 mM ATP and 0.1 to 0.5 mM dATP) (Bochner &  
 241 Ames, 1982; Buckstein, He, & Rubin, 2008). At the higher protein concentrations used in  
 242 SEC (as compared to GEMMA) NrdB eluted predominantly as dimers rather than monomers  
 243 in the absence of effectors and similar results were also obtained in the presence of ATP. In  
 244 agreement with the GEMMA results, the distribution was shifted towards tetramers in the  
 245 presence of dATP (Fig. 5a). Without effectors, NrdA was mainly in a monomeric state, while  
 246 it was dominated by dimers in the presence of either of the two effectors (Fig. 5b). When  
 247 NrdA and NrdB were mixed in the absence of allosteric effectors, no complex was visible.  
 248 After addition of ATP, a new complex of ~200 kDa appeared (Fig. 5c). To verify its  
 249 composition and stoichiometry, we analyzed fractions eluted from SEC on SDS PAGE. Both  
 250 NrdA and NrdB were visible on the gel in a 1:1 molar ratio (Fig. 5c insert). This complex,  
 251 formed in conditions promoting active RNR, is conceivably an  $\alpha_2\beta_2$  complex. After addition of  
 252 the inhibiting effector dATP, a complex with a molecular mass consistent with  $\alpha_4\beta_4$  eluted.  
 253 The few differences between GEMMA and SEC are due to the different protein  
 254 concentrations used and a complementary SEC study at lower protein concentration  
 255 showed that the two methods are in good agreement with each other (Supplementary Fig.  
 256 S2). A summary of the protein complexes formed in the presence and absence of effectors  
 257 is presented in figure 5d.

258

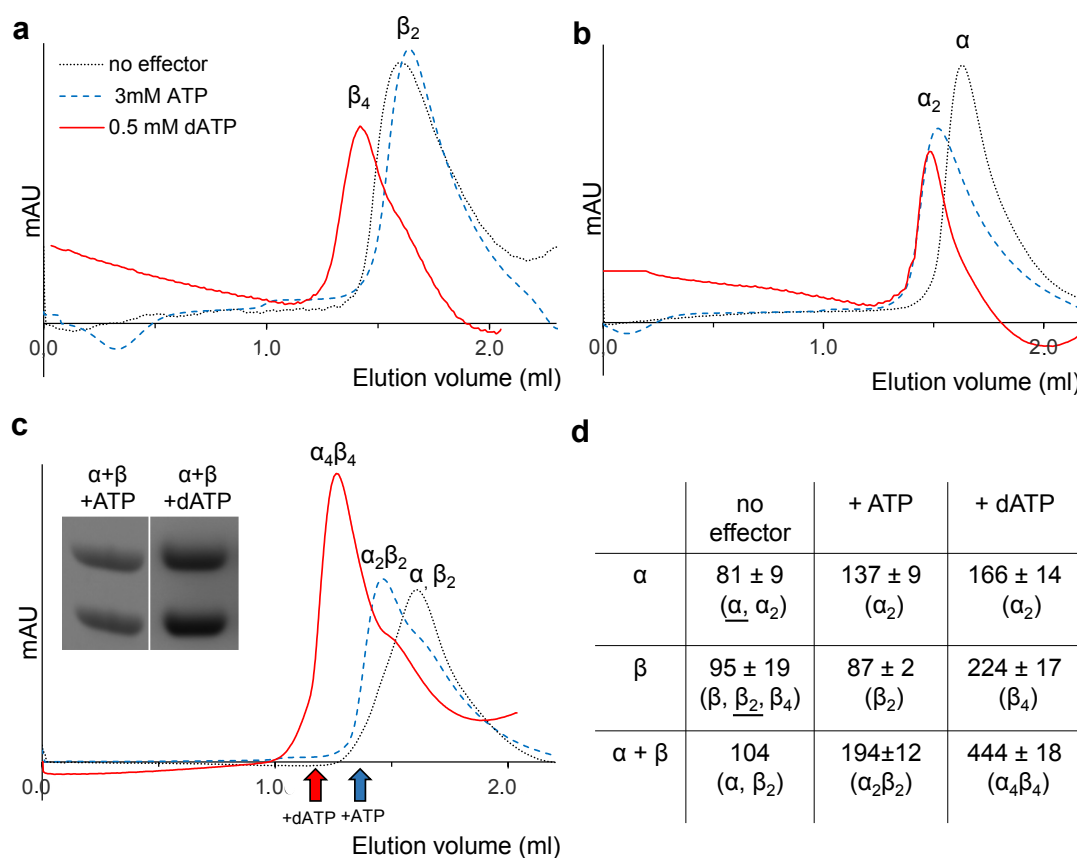

259

260 **Figure 5: Size exclusion chromatography of *L. blandensis* RNR in the absence and**  
261 **presence of 3 mM ATP or 0.5 mM dATP.** Proteins at concentrations of 20  $\mu$ M each were  
262 incubated separately or mixed together for 10 minutes in the absence (black dotted line) or  
263 presence of ATP (blue dashed line) or dATP (red solid line), centrifuged and applied to the  
264 column equilibrated with SEC buffer. Panels show NrdB (a), NrdA (b), and an equimolar  
265 mixture of NrdA and NrdB (c). C Insert: SDS PAGE of the eluted proteins run in the  
266 presence and absence of the indicated effectors. Elution positions of fractions applied to gel  
267 are indicated by *red* (in the presence of dATP) and *blue* (in the presence of ATP) arrows,  
268 respectively. d) Summary of multiple SEC experiments varying protein concentrations of  
269 NrdA (10-113  $\mu$ M), NrdB (5-150  $\mu$ M) and mixtures of NrdA and NrdB at ratios of 1:1 or 1:2.  
270 Molecular masses and standard deviations are calculated for 3-5 experiments, and closest  
271 estimated complex stoichiometry are shown in parenthesis, with major species underlined  
272 when appropriate (see Supplementary Fig. S2 for details).

273

## 274 Three-dimensional structure of *L. blandensis* NrdB

275 The crystal structure of the dATP-inhibited complex of *L. blandensis* NrdB at 2.45  $\text{\AA}$   
276 resolution (PDB 5OLK) revealed a novel tetrameric arrangement hitherto not observed in the  
277 RNR family, with approximate 222 point symmetry (Fig. 6a, Supplementary Table S1). Each  
278 monomer consists of an ATP-cone domain (residues 1-103) joined by a short linker (104-  
279 106) to a metal-binding  $\alpha$ -helical core domain (residues 107-398) and a disordered C-  
280 terminus (399-427). The latter two features are typical of the NrdB/F family. This domain  
281 arrangement gives the NrdB monomer and dimer extended conformations that are  
282 presumably flexible in solution (Fig. 6b). The dimer buries about 1100  $\text{\AA}^2$  of solvent  
283 accessible area on each monomer. The tetrameric arrangement is completely dependent on  
284 interactions between the ATP cone domains, as no contacts are made between the core  
285 domains in the two dimers that make up the tetramer (Fig. 6a).

286 The ATP-cone domain in *L. blandensis* NrdB is structurally very similar to the one recently  
287 identified in the NrdA protein of *P. aeruginosa* (Johansson et al., 2016). The root-mean-  
288 square deviation for 92 equivalent C $\alpha$  atoms is 1.2  $\text{\AA}$ . The electron density unambiguously  
289 confirms the *L. blandensis* ATP-cone's ability to bind two molecules of dATP, which it shares  
290 with *P. aeruginosa* NrdA (Fig. 6c). Despite a local sequence identity of only 31% to *P.*  
291 *aeruginosa* NrdA, all amino acids involved in binding both dATP molecules are conserved  
292 (Fig. 6c). The two dATP molecules bind in a "tail-to-tail" arrangement that orients the base of  
293 the "non-canonical" dATP towards the fourth, most C-terminal helix, an arrangement made  
294 possible by the binding of a Mg $^{2+}$  ion between the triphosphate moieties.

295 Remarkably, the interactions between the ATP-cones in *L. blandensis* NrdB are also very  
296 similar to those seen in *P. aeruginosa* NrdA (Johansson et al., 2016), despite the fact that  
297 the ATP-cone is attached to a structurally completely different core domain. The main  
298 interactions occur between the last two helices  $\alpha$ 3 and  $\alpha$ 4 in respective ATP-cones (Fig. 6d).  
299 A hydrophobic core in *L. blandensis* NrdB involving residues Met80, Ile92 and Ile93 in both  
300 monomers is reinforced by salt bridges between residues Asp73, Asp76 in one monomer  
301 and Lys89 in the other. The two domains bury  $\sim$ 510  $\text{\AA}^2$  of solvent accessible area. This is  
302 slightly less than the  $\sim$ 640  $\text{\AA}^2$  buried in the equivalent interaction involving the ATP-cones of  
303 *P. aeruginosa* NrdA. Within each ATP cone, helices  $\alpha$ 3 and  $\alpha$ 4 have the same relative

304 orientation, partly determined by an internal salt bridge between the conserved Asp73 and  
305 Arg95, but the helix pair in *L. blandensis* NrdB is rotated relative to its counterpart in the  
306 other ATP cone by about 15° compared to *P. aeruginosa* NrdA, which reduces the number  
307 of possible interactions between them. Interestingly, the dATP-induced tetramer leaves free  
308 the surfaces of both dimers of *L. blandensis* NrdB that are thought to interact with the NrdA  
309 subunit in productive RNR complexes, which implies that one or two dimers of *L. blandensis*  
310 NrdA could attach to these surfaces in a near-productive fashion in  $\alpha_2\beta_4$  or  $\alpha_4\beta_4$  complexes  
311 (Fig. 6a).

312 Two metal ions are found to bind to each of the monomers of *L. blandensis* NrdB.  
313 Comparison of their B-factors with those of surrounding atoms suggest that they are fourth  
314 row elements with close to full occupancy, but does not enable us to distinguish between  
315 Mn, Fe or Ca. No metal ions were added to the protein preparation, but crystals were  
316 obtained in 0.2 M CaCl<sub>2</sub>. The coordination distances are long for an RNR metal center, with  
317 the smallest distances being 2.3–2.4 Å. The distance between metal ions varies between  
318 3.4–3.8 Å in the four monomers (Supplementary Fig. S3), but the metal coordination is very  
319 similar. Interestingly, Tyr207 is found near the metal site at the position expected for a  
320 radical-carrying Tyr, but it is not hydrogen-bonded to the metal site, its hydroxyl group being  
321 at around 6 Å from the side chain of Glu170. Tyr207 is H-bonded to the side chain of  
322 Thr294, but the latter is not H-bonded to a metal center ligand. On the other side of the metal  
323 site, Trp177 is H-bonded to the side chain of Glu263. This tryptophan is completely  
324 conserved in the NrdBi subclass (Supplementary Fig. S4). It makes the same interaction as  
325 Trp111 from *E. coli* NrdB, despite the fact that it is projected from the first helix of the 4-helix  
326 bundle containing the metal center ligands rather than the second. The first helix of the  
327 bundle has a very unusual distortion in the middle (Supplementary Fig. S5). Normally this is  
328 an undistorted  $\alpha$ -helix, but in *L. blandensis* NrdB, residues 171–175 form a loop that bulges  
329 away from the metal site, with the exception of Lys174, whose side chain is projected  
330 towards the metal site and is H-bonded to Glu170 (Fig. 6e). The significance of this distortion  
331 is at present not clear.

332 The nature of the metallo-cofactor was addressed by X-band EPR spectroscopy and  
333 catalytically active samples were analyzed at 5 - 32 K. The spectra revealed a mixture of  
334 signals from low and high-valent manganese species (Fig. 7a). In particular, at 5 K a 6-line  
335 signal attributable to low valent Mn (Mn<sup>II</sup>) was clearly visible, overlaid with a complex  
336 multiline signal with a width of approximately 1250G. Increasing the temperature to 32 K  
337 resulted in a significant decrease of the latter signal, while the 6-line feature remained  
338 relatively intense (Fig. 7a, top and middle). The shape, width and temperature dependence  
339 of the multiline signal are all highly reminiscent of the signal reported for super-oxidized  
340 manganese catalase as well as the 16-line signal observed during the assembly of the  
341 dimanganese/tyrosyl radical cofactor in NrdF RNR, and is attributable to a strongly coupled  
342 Mn<sup>III</sup>Mn<sup>IV</sup> dimer ( $S_{\text{Total}} = 1/2$ ) (Fig. 7a, bottom) (Cotruvo, Stich, Britt, & Stubbe, 2013; Zheng,  
343 Khangulov, Dismukes, & Barynin, 1994). The low valent species appeared to be weakly  
344 bound to the protein, while the Mn<sup>III</sup>Mn<sup>IV</sup> dimer was retained in the protein following desalting  
345 (Supplementary Fig. S6). The observation of a high-valent Mn cofactor is consistent with the  
346 Mn-dependent increase in catalytic activity of the enzyme and its inhibition by the addition of  
347 Fe<sup>2+</sup> (Fig. 7b-c), and is suggestive of a novel high-valent homodimeric Mn-cofactor. Indeed,  
348 earlier calculations have shown that high-valent Mn-dimers have reduction potentials similar  
349 to that of the tyrosyl radical in standard class I RNRs

350 (Roos & Siegbahn, 2011). A more detailed biophysical characterization of this cofactor is  
351 currently ongoing.

352

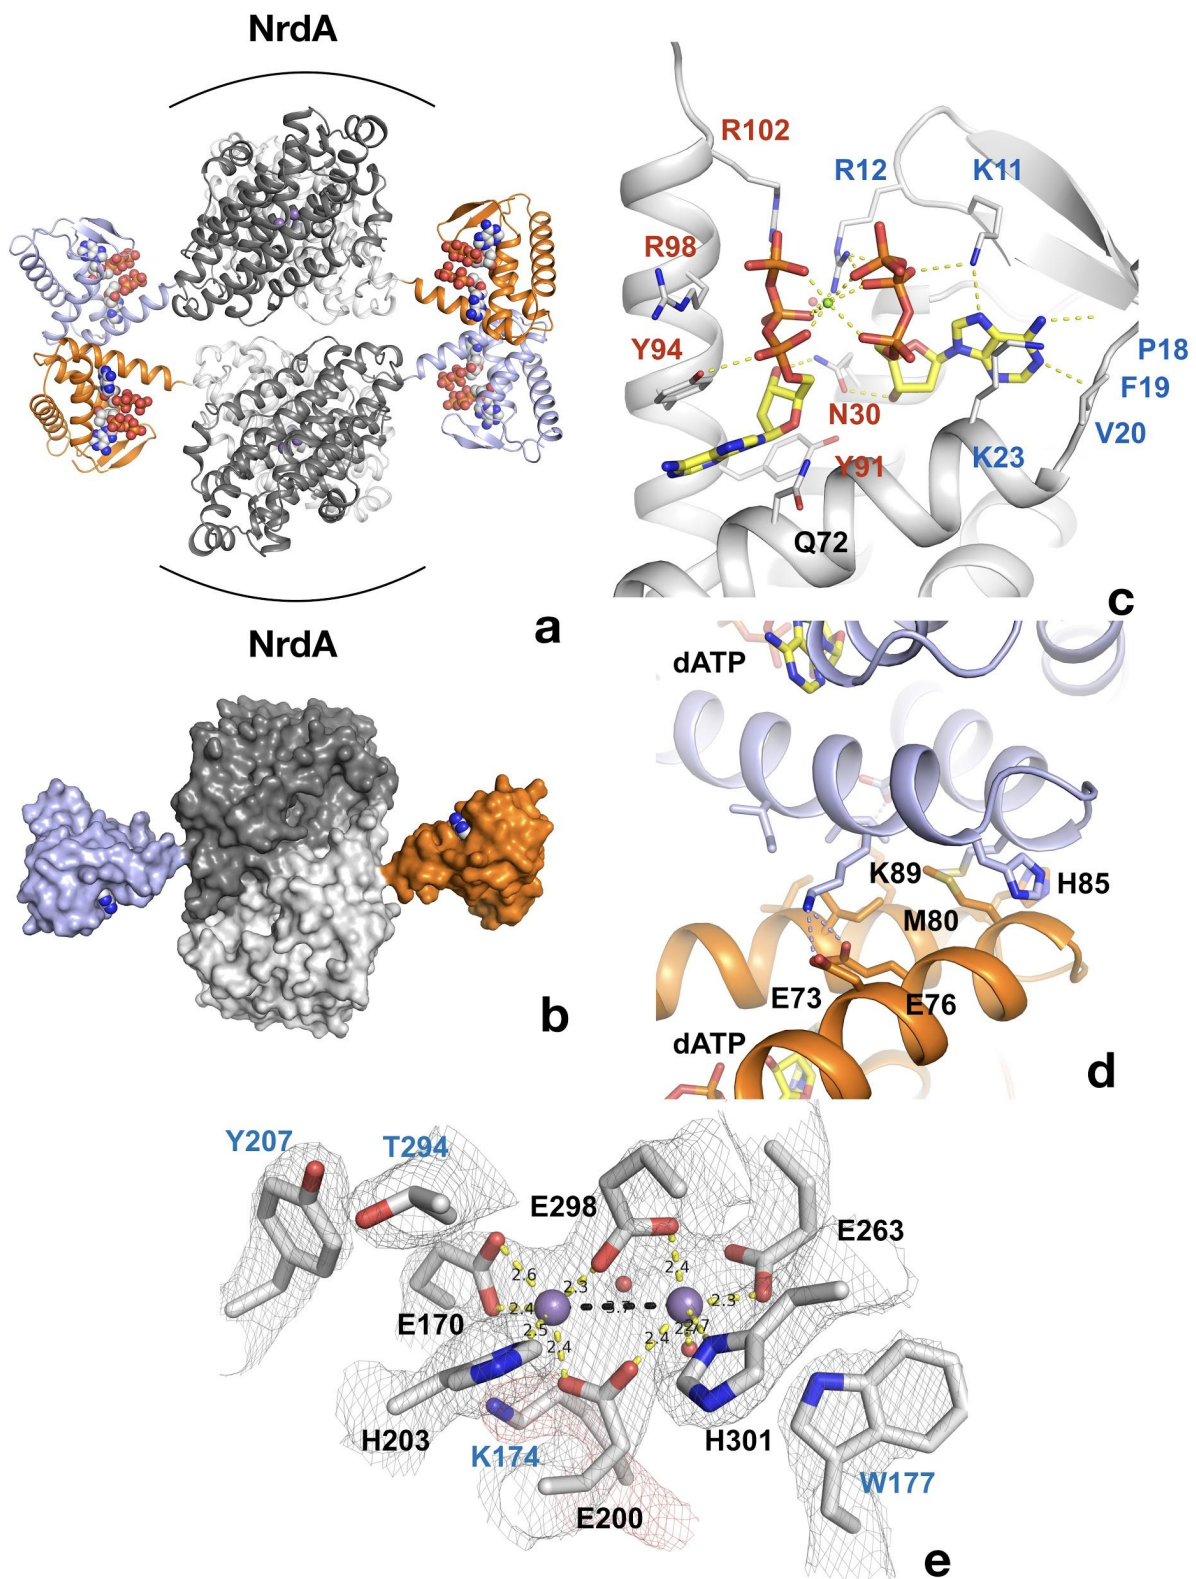

353

354 **Figure 6. Structure of tetrameric *L. blandensis* NrdB in complex with dATP.** a) Overall  
 355 structure of the NrdB tetramer. The two monomers of each dimer are colored in different  
 356 shades of gray, while the N-terminal ATP-cones are colored orange and light blue  
 357 respectively. The dATP molecules are shown in CPK representation. The curved lines at the  
 358 top and bottom of each dimer core indicate the proposed binding area in the active  $\alpha_2\beta_2$   
 359 complex of RNRs. b) Surface representation of the NrdB dimer, showing the presumably  
 360 flexible nature of the ATP-cones in solution. The color scheme is as in panel a). c) Binding of  
 361 two dATP molecules to the ATP-cone. The dATP molecules are shown as sticks. Residues  
 362 involved in binding the two dATP molecules are labeled in blue and red respectively. Polar  
 363 contacts are shown as dotted yellow lines. d) The interface between ATP-cones in the NrdB  
 364 tetramer. Chains A and D are shown in light blue and orange respectively. Side chains of  
 365 residues involved in the interface are labeled. The two dATP molecules closest to the  
 366 interface are shown as sticks. Polar contacts are shown as yellow dotted lines. e) Structure  
 367 of the metal site in chain C, which is representative of the others. Metal ions are shown as  
 368 purple spheres.  $2m|Fo|-D|Fc|$  electron density is shown as a grey mesh, contoured at  $1.4 \sigma$ .  
 369 The density for Lys174 is shown in red for clarity.

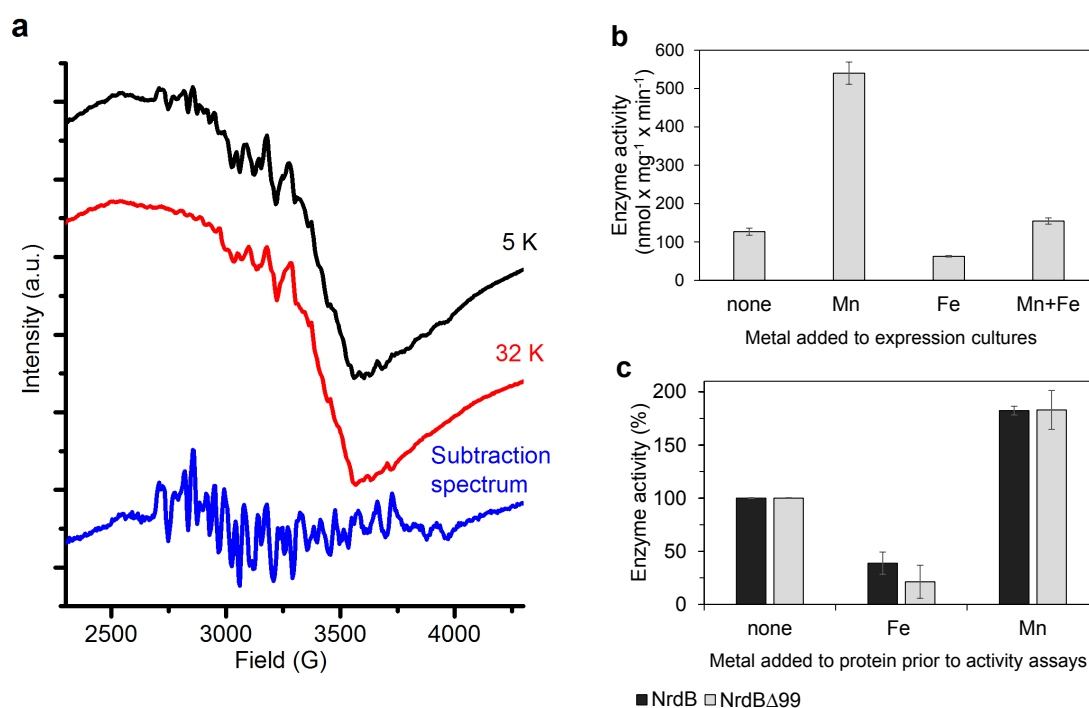

370

371

372 **Figure 7. Type of dinuclear metal center of *L. blandensis* NrdB and metal-dependency**  
 373 **of enzyme activity.** (a) X-band EPR spectra of catalytically active, non-reconstituted,  
 374 samples recorded at 5 K (*black*, top); 32 K (*red*, middle) (signal intensity multiplied by 3.7  
 375 for clarity; multiline spectrum obtained by subtraction of a scaled 32K spectrum from the 5K  
 376 spectrum (*blue*, bottom) (signal intensity multiplied by 3 for clarity). Instrument settings:  
 377 microwave frequency = 9.28 GHz; power = 1 mW; modulation amplitude = 10G; modulation  
 378 frequency = 100 kHz. (b) Enzyme activity of NrdBΔ99 purified from heterologously  
 379 expressed cultures grown with addition of different divalent metal ions as indicated; the Mn-  
 380 sample was used for the EPR analysis. (c) Enzyme activity was measured after addition of a  
 381 total concentration of 20  $\mu$ M divalent metal ions to 10  $\mu$ M of wild-type or NrdBΔ99 protein as

382 indicated. Enzyme activity without addition of metals was set as 100% and corresponded to  
 383 592 and 217 nmol mg<sup>-1</sup> min<sup>-1</sup> for wild type and NrdB $\Delta$ 99 enzymes respectively. Error bars  
 384 indicate the standard deviation of three measurements.

### 385 *L. blandensis* NrdB binds two nucleotide molecules per ATP- 386 cone

387 The finding that two dATP molecules were bound to the ATP-cone in the 3D structure  
 388 prompted us to investigate nucleotide binding using isothermal titration calorimetry (ITC).  
 389 Binding curves for dATP, ATP and dADP to NrdB, including a reverse titration of NrdB to  
 390 dATP, were all consistent with a single set of binding sites except for the ATP-cone deletion  
 391 mutant (NrdB $\Delta$ 99), which did not bind nucleotides at all (Fig. 8). Using information available  
 392 from the 3D structure, a fixed stoichiometry of 2 was used to fit dATP binding to NrdB. The fit  
 393 indicated 59% active (i.e. nucleotide binding) protein. Fitting dADP and ATP with a 59%  
 394 proportion of active protein taken from the dATP experiment, we could calculate  
 395 stoichiometries of 2.2 and 2.1 for ATP and dADP respectively, indicating that each NrdB  
 396 monomer can bind two molecules of adenosine nucleotides (Fig. 8f).  $K_d$  for the three  
 397 different nucleotides (Fig. 8f) indicated a 38-fold and 15-fold lower affinity for ATP and dADP  
 398 compared to dATP. Thermodynamic parameters (Fig. 8f) indicated that the interactions are  
 399 enthalpy-driven, with negative  $\Delta H$  values of -79, -44 and -103 for dATP, ATP and dADP  
 400 respectively.

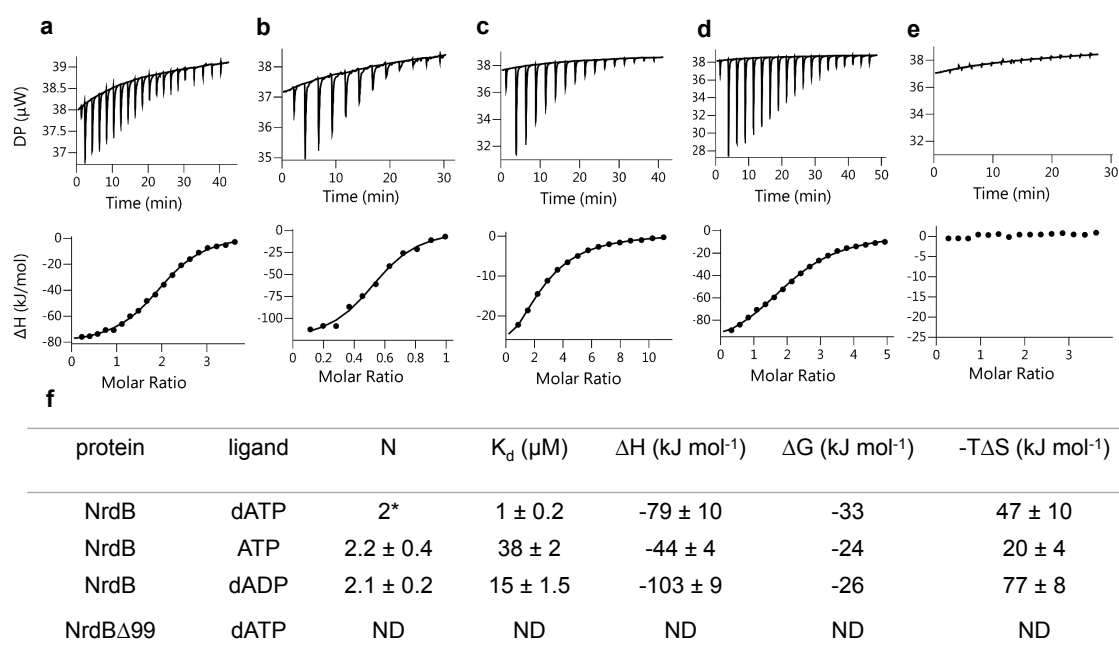

401

402 **Figure 8:** Representative ITC thermograms obtained by titration of dATP (a), ATP (c) and  
 403 dADP (d) into NrdB. Isothermal calorimetric enthalpy changes (upper panel) and resulting  
 404 binding isotherms (lower panel) are shown. Reverse titration of NrdB to dATP (b). Titration of  
 405 dATP to NrdB $\Delta$ 99 (e). Thermodynamic parameters of ligand binding to NrdB (f). Binding  
 406 isotherms were fitted using a one-set-of sites binding model. Values are reported as the  
 407 mean  $\pm$  SD of three titrations (and additional two reverse titrations for dATP). All titrations



408 were performed at 10°C as described in Materials and Methods. \*=binding stoichiometry was  
409 kept constant N=2, considering monomeric protein concentrations. ND=not detected.

## 410 Discussion

411 It is critically important for an organism to control the supply of dNTPs to allow fidelity in DNA  
412 replication and repair (Mathews, 2006). Specificity regulation of RNR makes sure relative  
413 concentrations of dNTPs fit the organism's DNA composition. On the other hand, activity  
414 regulation assures absolute concentrations of dNTPs follow the different requirements  
415 through the cell cycle (Hofer et al., 2012). Specificity regulation of RNRs is ubiquitous,  
416 integrated in the catalytic subunit of the enzyme, and works via the classical homooligomeric  
417 model of allosteric regulation (Andersson et al., 2000; Hofer et al., 2012; Larsson et al.,  
418 2004; Reichard, 2010; Swain & Gierasch, 2006; Torrents et al., 2000; Zimanyi et al., 2016).  
419 In contrast, the activity regulation is controlled by an accessory domain, the ATP-cone, and  
420 works by affecting the distribution of the holoenzyme heteromeric complexes. Moreover, the  
421 ATP-cone is only found in some RNRs, and appears to be gained by domain shuffling when  
422 evolutionary selection favours it and lost when selection decreases (Lundin, Berggren,  
423 Logan, & Sjöberg, 2015). These dynamics are further evidenced by the differences in  
424 mechanisms recently discovered in class I RNRs (Ando et al., 2011; Ando et al., 2016;  
425 Fairman et al., 2011; Johansson et al., 2016; Jonna et al., 2015). The current study was  
426 prompted by the interesting observation that several radical-generating subunits of the NrdBi  
427 subclass possess an N-terminal ATP-cone and that a few radical-generating subunits of the  
428 NrdF subclass possess a C-terminal ATP-cone. Our discovery evokes several pertinent  
429 questions: does the ATP-cone fused to a radical-generating subunit function as an allosteric  
430 on/off switch; how does it affect the distribution of holoenzyme complexes under active and  
431 inhibited conditions; is its structural mode of action similar to that of ATP-cones fused to the  
432 catalytic subunit?

433 We have delineated the function of the ATP-cone that is N-terminally fused to the *L.*  
434 *blandensis* NrdBi protein. In the presence of the positive effector ATP, *L. blandensis* NrdBi  
435 was a dimer, which by interaction with the *L. blandensis* catalytic subunit NrdAi formed the  
436 common active  $\alpha_2\beta_2$  complex, also found in e.g. *E. coli*, *P. aeruginosa* and eukaryotic class I  
437 RNRs. Binding of dATP to the ATP-cone instead promoted oligomerization of *L. blandensis*  
438 NrdBi to an inactive  $\beta_4$  complex, with a novel tetrameric structure revealed by  
439 crystallography. This oligomerization is reminiscent of the "ring-shaped"  $\alpha_4$  and  $\alpha_6$  complexes  
440 formed by dATP binding to the NrdA-linked ATP-cones in *P. aeruginosa* and eukaryotic  
441 RNRs. When *L. blandensis* NrdAi was added to the dATP-loaded NrdBi tetramer, higher  
442 molecular mass complexes of  $\alpha_2\beta_4$  and  $\alpha_4\beta_4$  appeared. The NrdA dimers presumably bind to  
443 the NrdB tetramers in a 'nonproductive' orientation, which does not allow efficient electron  
444 transfer between NrdA and NrdB. The crystal structure shows that the tetramerization of *L.*  
445 *blandensis* NrdBi leaves the putative interaction surface for NrdAi free, which is consistent  
446 with the possibility to form both  $\alpha_2\beta_4$  and  $\alpha_4\beta_4$  oligomers. However the structure does not  
447 suggest the structural basis for a disruption of the cysteinyl radical generation pathway in  
448 these non-productive complexes.

449 The structure of the dATP-loaded *L. blandensis* NrdB shows that it binds two dATP  
450 molecules per ATP-cone. Both molecules bind to the same site and interact with each other  
451 through a  $Mg^{2+}$  ion. Most allosterically regulated RNRs characterized so far bind only one

452 dATP molecule per ATP-cone. However, a novel class of ATP-cones that binds two dATP  
453 molecules was recently characterized in *P. aeruginosa* NrdA (Johansson et al., 2016; Jonna  
454 et al., 2015). The NrdB-linked ATP-cone of *L. blandensis* has sequence motifs characteristic  
455 of this kind of ATP-cone. The structure confirms that both dATP molecules bind essentially  
456 identically as in *P. aeruginosa* NrdA and that the ATP-cones make similar interactions to  
457 each other, distinct from those made in the eukaryotic  $\alpha_6$  complexes. It has also been shown  
458 in the RNR transcriptional regulator NrdR, that ATP and dATP bind with positive  
459 cooperativity to its ATP-cone (McKethan & Spiro, 2013), implying binding of more than one  
460 nucleotide molecule.

461 The ATP-cone in *L. blandensis* NrdBi offers a unique possibility to measure its binding  
462 capacity for (deoxy)adenosine nucleotides. This has not been possible in earlier studied  
463 RNRs, where the ATP-cone is bound to the  $\alpha$  subunit that also possesses a binding site for  
464 allosteric regulation of substrate specificity. ITC ligand binding studies confirmed that the *L.*  
465 *blandensis* ATP-cone bound two dATP molecules, and showed that it also can bind two  
466 molecules of ATP or two molecules of dADP. Structurally, binding of dADP is not surprising,  
467 since the  $\gamma$ -phosphates of the dATP molecules make only one interaction with the protein,  
468 through Arg102, and they only contribute 2 of the 6 coordinating atoms of the intervening  
469  $Mg^{2+}$  ion. Nonetheless, this is the first observation of dADP binding to the ATP-cone of an  
470 RNR enzyme. dADP inhibits enzyme activity in a similar manner to dATP, but higher  
471 concentrations are required. *In vivo*, deoxyribonucleoside diphosphates are rapidly  
472 converted to triphosphates and cellular dADP concentrations are very low (Mathews, 2014;  
473 Traut, 1994). Nevertheless, dADP is one of the products of *L. blandensis* RNR, and perhaps  
474 local concentrations are higher. The ability of dADP to regulate the activity of *L. blandensis*  
475 RNR may enable it to react more rapidly to changes in (deoxy)adenosine nucleotide  
476 concentrations and provide the cell with a fitness advantage. Binding of deoxyadenosine di-  
477 and monophosphates has been described for the ATP-cone in NrdR (Grinberg et al., 2006;  
478 McKethan & Spiro, 2013).

479 Based on the variable occurrence of the ATP-cone in RNR catalytic subunits, we have  
480 earlier hypothesized that its presence in RNRs is part of a dynamic process of gains and  
481 losses on a relatively short evolutionary time scale (Lundin et al., 2015). This suggests that  
482 the ATP-cone, contrary to what might be expected for a domain involved in allostery, does  
483 not require a long evolutionary period of integration with a protein to contribute to regulation  
484 and that it hence lends itself to a highly dynamic evolution of allosteric activity control  
485 (Lundin et al., 2015). This hypothesis is nicely supported by the N-terminally positioned ATP-  
486 cone, in the radical-generating subunit, NrdB, of *L. blandensis* RNR described here. No RNR  
487 in the phylogenetic subclass NrdAi/Bi contains an ATP-cone in the catalytic subunit, and only  
488 a minority – mostly encoded by Flavobacteria, a marine class of Bacteroidetes – have an  
489 NrdB with an ATP-cone, suggesting the relatively recent acquisition of the ATP-cone to an  
490 RNR subclass that is otherwise not activity regulated (Fig. 1). Moreover, in the Ib subclass,  
491 which also lacks ATP-cones in the catalytic subunit, we detected a C-terminally positioned  
492 ATP-cone in the radical-generating subunit. This was found in only two sequences from  
493 closely related organisms and might hence be an example of an even more recent  
494 evolutionary event.

495 The evidence we have presented here for an ATP/dATP-sensing master switch of the *L.*  
496 *blandensis* NrdAi/NrdBi class I RNR, suggests a potential for the use of ATP-cones to  
497 control the activity of engineered proteins. Multimeric enzymes could be inactivated through

498 sequestration of one member of an active complex, by control of dATP concentrations in the  
499 reaction mixture.

500 The surprises did not end with the discovery of a functional master switch in the *L.*  
501 *blandensis* NrdAi/NrdBi RNR. The active center of the radical generating subunit of class I  
502 RNRs have earlier been found to consist either of an Fe<sup>III</sup>Fe<sup>III</sup> or Mn<sup>III</sup>Mn<sup>III</sup> pair coupled to a  
503 tyrosine residue acting as long-term storage for the catalytically essential radical (Berggren,  
504 Lundin, & Sjöberg, 2017; Cotruvo & Stubbe, 2012), or a Fe<sup>III</sup>Mn<sup>IV</sup> center not coupled to an  
505 amino acid radical (Griese, Srinivas, & Högbom, 2014). Although further analyses are  
506 required to fully characterize the *L. blandensis* NrdBi active center, it appears to present a  
507 fourth type, a high-valent Mn<sup>III</sup>Mn<sup>IV</sup> center that lacks a suitably positioned radical storage  
508 amino acid. The evolutionary flexibility displayed by the ATP-cone appears hence all but  
509 equaled by the evolutionary tuning possibilities of the metal centers in the radical generating  
510 subunit of class I RNR.

## 511 Materials and Methods

### 512 Cloning

513 DNA fragments encoding NrdAi (WP\_009781766) and NrdBi (EAQ51288) were amplified by  
514 PCR from *Leeuwenhoekiella blandensis* MED217 genomic DNA, isolated as described  
515 previously (Pinhassi et al., 2006), using specific primers: NrdA: LBR1\_For 5'-  
516 cgagCATATGAGAGAAAACACTACCAAAC-3' and LBR1\_Rev 5'-  
517 gcaaGGATCCTTAAGCTTCACAGCTTACA-3'. NrdB: LBR2\_For 5'-  
518 cgagCATATGAGTTCACAAGAGATCAAA-3', LBR2\_REV 5'-  
519 gcaaGGATCCTTAAATAAGTCGTCGCTG-3'. The PCR products were purified, cleaved  
520 with NdeI and BamHI restriction enzymes and inserted into a pET-28a(+) expression vector  
521 (Novagen, Madison, Wisconsin, USA). The obtained constructs pET-*nrdA* and pET-*nrdB*  
522 contained an N-terminal hexahistidine (His) tag and thrombin cleavage site. To construct a  
523 truncated NrdB mutant, lacking the entire ATP-cone domain, new forward primer  
524 LBR2Δ99\_For 5'-cgatCATATGCTGGAGCGTAAAACAAAT-3' was used with LBR2\_REV to  
525 yield a pET-*nrdB*Δ99. The cloning process and the resulting construct was similar to that of  
526 the wild type protein, except that it lacked sequence coding for the N-terminal 99 amino  
527 acids.

### 528 Protein expression

529 Overnight cultures of *E. coli* BL21(DE3)/pET28a(+) bearing pET-*nrdA*, pET-*nrdB* and pET-  
530 *nrdB*Δ99 were diluted to an absorbance at 600 nm of 0.1 in LB (Luria-Bertani) liquid medium,  
531 containing kanamycin (50 µg/ml) and shaken vigorously at 37°C. At an absorbance at 600  
532 nm of 0.8, isopropyl-β-D-thiogalactopyranoside (Sigma) was added to a final concentration  
533 of 0.01 mM for NrdA expression and 0.5 mM for NrdB and NrdBΔ99 expression. For  
534 particular experiments, 0.5 mM MnSO<sub>4</sub> or 0.5 mM FeNH<sub>4</sub>(SO<sub>4</sub>)<sub>2</sub> or the combination of both  
535 metals (0.4 mM and 0.25 mM respectively) were added to NrdBΔ99 cultures. The cells were  
536 grown overnight at 14°C for NrdA expression and 20°C for NrdB and NrdBΔ99 expression  
537 and harvested by centrifugation.

## 538 Protein purification

539 The cell pellet was resuspended in lysis buffer: 50 mM Tris-HCl pH 7.6 containing 300 mM  
540 NaCl, 20% glycerol, 10 mM imidazole, 1 mM PMSF. Cells were disrupted by high pressure  
541 homogenization and the lysate was centrifuged at 18,000 × g for 45 min at 4°C. The  
542 recombinant His-tagged protein was first isolated by metal-chelate affinity chromatography  
543 using ÄKTA prime system (GE Healthcare): the supernatant was loaded on a HisTrap FF Ni  
544 Sepharose column (GE Healthcare), equilibrated with lysis buffer (w/o PMSF), washed  
545 thoroughly with buffer and eluted with buffer containing 500 mM imidazole. Further  
546 purification was accomplished by fast protein liquid chromatography (FPLC) on a 125 ml  
547 column packed with Superose 12 Prep Grade or HiLoad 16/600 Superdex 200 pg column  
548 (GE Healthcare) using ÄKTA prime system, equilibrated with buffer containing 50 mM Tris-  
549 HCl pH 7.6, 300 mM NaCl, 10-20% glycerol. Eluted protein was collected. In the case of  
550 NrdA, all purification steps were performed in the presence of 2 mM DTT. Protein  
551 concentration was determined by measuring the UV absorbance at 280 nm based on protein  
552 theoretical extinction coefficients 91,135, 46,870 and 39,420 M<sup>-1</sup> cm<sup>-1</sup> for NrdA, NrdB and  
553 NrdB $\Delta$ 99 respectively. Proteins were concentrated using Amicon Ultra-15 centrifugal filter  
554 units (Millipore), frozen in liquid nitrogen and stored at -80°C until used.

555 For crystallization, NrdB was subsequently cleaved by thrombin (Novagen) to remove the  
556 hexahistidine tag. 41 mg NrdB was incubated with 25 U thrombin at 6°C for 3 hours, in a  
557 buffer containing 40 mM Tris-HCl pH 8.4, 150 mM NaCl, and 2.5 mM CaCl<sub>2</sub> in a total volume  
558 of 50 ml. Subsequently, imidazole to a final concentration of 20 mM was added and the  
559 reaction mixture was applied to a HisTrap FF Ni Sepharose column in a buffer containing 20  
560 mM imidazole. Unbound protein was collected, concentrated and further purified by FPLC  
561 (see above) in a buffer containing Tris-HCl pH 7.6, 300 mM NaCl, and 10% glycerol. The  
562 thrombin-cleaved NrdB contained three additional residues (GlySerHis) that originated from  
563 the cleavage site of the enzyme at its N-terminus. Protein purity was evaluated by SDS-  
564 PAGE (12%) stained with Coomassie Brilliant Blue.

565 For EPR measurements, NrdB $\Delta$ 99 was frozen in liquid nitrogen in EPR tubes directly after  
566 imidazole elution from the HisTrap column. Additional EPR samples were frozen after  
567 desalting the protein using PD-10 desalting columns (GE Healthcare).

## 568 Enzyme activity assays

569 Enzyme assays were performed at room temperature in 50 mM Tris-HCl at pH 8 in volumes  
570 of 50  $\mu$ l. Reaction conditions, giving maximal activity were determined experimentally. In a  
571 standard reaction the constituents were; 10 mM DTT, 10 mM MgAc, 10 mM KCl, 0.8 mM (or  
572 when indicated 3 mM) CDP, and various concentrations of allosteric effectors ATP, dATP or  
573 dADP. Mixtures of 0.5  $\mu$ M NrdA and 2  $\mu$ M wild type NrdB or NrdB $\Delta$ 99 (for determination of s-  
574 site K<sub>L</sub>) (Fig. 3a-b) or 0.5  $\mu$ M of NrdB and 2  $\mu$ M NrdA (for determination of a-site K<sub>L</sub>), (Fig. 3  
575 c-f) were used. Some components were explicitly varied in specific experiments. Generally,  
576 0.8 mM CDP was used as substrate. High CDP concentration (3 mM) was used for dADP  
577 titrations, to exclude potential product inhibition by binding of dADP to the active site. When  
578 dTTP was used as an s-site effector, 0.5 mM or 0.8 mM GDP was used as substrate. In four  
579 substrate assays, the four substrates CDP, ADP, GDP and UDP were simultaneously  
580 present in the mixture at concentrations of 0.5 mM each. The substrate mixture was added

581 last to start the reactions. Certain assays were performed in the presence of  $\text{Mn}(\text{CH}_3\text{COO})_2$   
582 or  $\text{FeNH}_4(\text{SO}_4)$ : 20  $\mu\text{M}$  of the indicated metal was added to 10  $\mu\text{M}$  NrdB or NrdB $\Delta$ 99 protein,  
583 incubated for 10 minutes, mixed with NrdA and added to the reaction mixture.

584 Enzyme reactions were incubated for 10-30 minutes and then stopped by the addition of  
585 methanol. The chosen incubation time gave a maximum substrate turnover of 30%.  
586 Substrate conversion was analyzed by HPLC using a Waters Symmetry C18 column (150  $\times$   
587 4.6 mm, 3.5  $\mu\text{m}$  pore size) equilibrated with buffer A. 25  $\mu\text{l}$  samples were injected and eluted  
588 at 1 ml/min with a linear gradient of 0–100% buffer B (buffer A: 10% methanol in 50 mM  
589 potassium phosphate buffer, pH 7.0, supplemented with 10 mM tributylammonium  
590 hydroxide; buffer B: 30% methanol in 50 mM potassium phosphate buffer, pH 7.0,  
591 supplemented with 10 mM tributylammonium hydroxide). Compound identification was  
592 achieved by comparison with injected standards. Relative quantification was obtained by  
593 peak height measurements in the chromatogram (UV absorbance at 271 nm) in relation to  
594 standards. Specific activities of either NrdA (Fig. 2 a-b) or NrdB (Fig. 2 c-f) were determined.  
595 Specific activities varied between protein preparations. In some cases the data was  
596 standardized to activity percent, where 100% was determined as maximum enzyme activity  
597 in a specific condition.

598 From a direct plot of activity versus concentration of effector, the  $K_L$  values for binding of  
599 effectors to the s-site and the a-site, were calculated in SigmaPlot using the equation:

$$600 \quad v = V_{\max} \times [\text{dNTP}] / (K_L + [\text{dNTP}])$$

601 and  $K_i$  for non-competitive dATP inhibition at NrdB was calculated in Sigmaplot using the  
602 equation:

$$603 \quad v = V_{\max} / (1 + ([\text{dNTP}]/K_i))$$

## 604 GEMMA analysis

605 In GEMMA, biomolecules are electrosprayed into gas phase, neutralized to singly charged  
606 particles, and the gas phase electrophoretic mobility is measured with a differential mobility  
607 analyzer. The mobility of an analyzed particle is proportional to its diameter, which therefore  
608 allows for quantitative analysis of the different particle sizes contained in a sample  
609 (Kaufman, Skogen, Dorman, Zarrin, & Lewis, 1996). The GEMMA instrumental setup and  
610 general procedures were as described previously (Rofougaran et al., 2008). NrdA, NrdB and  
611 NrdB $\Delta$ 99 proteins were equilibrated by Sephadex G-25 chromatography into a buffer  
612 containing 100 mM ammonium acetate, pH 7.8. In addition, 2 mM DTT was added to the  
613 NrdA protein solutions to increase protein stability. Prior to GEMMA analysis, the protein  
614 samples were diluted to a concentration of 0.025–0.1 mg/ml in a buffer containing 20 mM  
615 ammonium acetate, pH 7.5, 0.005% (v/v) Tween 20, nucleotides (when indicated), and  
616 magnesium acetate (equimolar to the total nucleotide concentration), incubated for 5 min at  
617 room temperature, centrifuged and applied to the GEMMA instrument. Protein  
618 concentrations higher than normally recommended for GEMMA were needed to see the  
619 larger oligomeric complexes and the experiments to measure NrdA-NrdB interactions were  
620 run at as low flow rate as possible (driven by 1.4 Psi pressure) to minimize false interactions  
621 that may appear with elevated protein concentration if the flow-rate recommended by the

622 manufacturer is used (3.7 Psi). The lower flow-rates give less sensitivity, though, and a flow  
623 rate driven by 2 Psi was sufficient to prevent in most experiments.

## 624 Analytical size exclusion chromatography

625 Fast protein liquid chromatography on a Superdex 200 PC 3.2/30 column (with a total  
626 volume of 2.4 ml) and ÄKTA prime system (GE Healthcare) was performed. The column was  
627 equilibrated with SEC buffer containing 50 mM Tris-HCl pH 8, 50 mM KCl, 10% glycerol, 10  
628 mM magnesium acetate, 2 mM DTT and when applicable either 3 mM ATP or 0.1-0.5 mM  
629 dATP. 50  $\mu$ L samples containing NrdA, NrdB or both subunits in the presence or the  
630 absence of indicated amounts of nucleotides, were incubated for 10 minutes in room  
631 temperature, centrifuged and applied to the column with a flow rate of 0.07 ml/min. When  
632 nucleotides were added to proteins, they were also included in the buffer at the same  
633 concentration to avoid dissociation of nucleotide-induced protein complexes during the run.  
634 Varying concentrations of proteins were used in the range of 10-113  $\mu$ M and 5-150  $\mu$ M for  
635 NrdA and NrdB respectively. For complex formation, 10-20  $\mu$ M NrdA and 10-40  $\mu$ M NrdB  
636 were used in ratios of 1:1 or 1:2. Representative SEC chromatograms in which 20  $\mu$ M NrdA,  
637 20  $\mu$ M NrdB or a mixture of 25  $\mu$ M and 50  $\mu$ M NrdA and NrdB respectively are shown in Fig.  
638 5. Molecular weight was estimated based on a calibration curve, derived from globular  
639 protein standards using high molecular weight SEC marker kit (GE Healthcare). Standard  
640 deviations were calculated from at least 3 SEC experiments.

## 641 EPR measurements

642 Measurements were performed on a Bruker ELEXYS E500 spectrometer using an ER049X  
643 SuperX microwave bridge in a Bruker SHQ0601 cavity equipped with an Oxford Instruments  
644 continuous flow cryostat and using an ITC 503 temperature controller (Oxford Instruments).  
645 Measurement temperatures ranged from 5 to 32 K, using liquid helium as coolant. The  
646 spectrometer was controlled by the Xepr software package (Bruker).

## 647 Bioinformatics

648 RNR protein sequences were collected and scored using HMMER (Eddy, 2011) HMM  
649 profiles in the RNRdb (<http://rnrdp.pfitmap.org>). ATP-cones were identified with the Pfam  
650 ATP-cone HMM profile: PF03477. Sequences representing the diversity of NrdB were  
651 selected by clustering all NrdB sequences from RefSeq at an identity threshold of 70% using  
652 VSEARCH (Rognes, Flouri, Nichols, Quince, & Mahe, 2016). Sequences were aligned with  
653 ProbCons (Do, Mahabhashyam, Brudno, & Batzoglou, 2005) and reliable positions for  
654 phylogenetic reconstruction were manually selected. A maximum likelihood phylogeny was  
655 estimated with FastTree 2 (Price, Dehal, & Arkin, 2010).

## 656 Isothermal titration calorimetry (ITC) measurements

657 Isothermal titration calorimetry (ITC) experiments were carried out on a MicroCal PEAQ-ITC  
658 system (Malvern Instruments Ltd) in a buffer containing 25 mM HEPES (pH 7.65), 150 mM  
659 NaCl, and 10% glycerol, 2 mM tris(2-carboxyethyl)phosphine, and 5 mM MgCl<sub>2</sub>.  
660 Measurements were done at 10°C. The initial injection volume was 0.4  $\mu$ l over a duration of  
661 0.8 s. All subsequent injection volumes were 2-2.5  $\mu$ l over 4-5 s with a spacing of 150 s  
662 between the injections. Data for the initial injection were not considered. For dATP binding

663 analysis, the concentration of NrdB in the cell was 12  $\mu\text{M}$  and dATP in syringe 120 or 140  
664  $\mu\text{M}$ . Reverse titrations were performed with 113  $\mu\text{M}$  NrdB in the syringe and 12 or 30  $\mu\text{M}$   
665 dATP in the cell. For titration of dATP into NrdB $\Delta$ 99, protein concentration in the cell and  
666 dATP concentration in the syringe were 50  $\mu\text{M}$  and 900  $\mu\text{M}$  respectively. For dADP binding  
667 analysis, the NrdB concentration in the cell was 20-50  $\mu\text{M}$  and ligand concentrations in the  
668 syringe were 500-750  $\mu\text{M}$ . For titration of ATP into NrdB, cell and syringe concentrations  
669 were 50 and 1600  $\mu\text{M}$  respectively. The data were analyzed using the built-in one set of  
670 sites model of the MicroCal PEAQ-ITC Analysis Software (Malvern Instruments Ltd). A fixed  
671 ligand/protein stoichiometry of 2 was used for dATP to NrdB titrations. Standard deviations in  
672 thermodynamic parameters,  $N$  and  $K_d$  were estimated from the fits of three different  
673 titrations.

## 674 Crystallization and data collection

675 The purified NrdB, digested by thrombin to remove the hexahistidine tag (see above), was  
676 used for crystallization. The protein at a concentration of 9.6 mg/ml was mixed with 20 mM  
677  $\text{MgCl}_2$ , 2 mM TCEP and 5 mM dATP, incubated for 30 minutes and used for setting up drops  
678 using commercially available screens. An initial crystal hit was obtained by the sitting drop  
679 vapor diffusion method with a protein to reservoir volume ratio of 200:200 nL and incubated  
680 with a 45  $\mu\text{l}$  reservoir in a Triple Drop UV Polymer Plate (Molecular Dimensions, UK). A  
681 Mosquito nanoliter pipetting robot (TTP Labtech, UK) was used to set up drops, which were  
682 imaged by the Minstrel HT UV imaging system (Rigaku Corporation, USA) available at the  
683 Lund Protein Production Platform (LP3). Crystals were obtained with a reservoir containing  
684 0.2 M  $\text{CaCl}_2$ , 0.1 M Tris pH 8.0 and 20% w/v PEG 600 (condition #57 of the PACT screen).  
685 The crystals were then further optimized using an additive screen (Hampton Research, USA)  
686 and diffraction quality crystals were obtained within 1 week from a crystallization solution  
687 containing an additional 3% 6-aminohexanoic acid. Crystals were picked up directly from the  
688 drop without cryoprotectant and data were collected at 100 K using the ID23-1 beamline at  
689 the ESRF, Grenoble, France.

## 690 Structure determination and model building

691 The diffraction images were integrated using the program XDS (Kabsch, 2010) and scaled  
692 using the program Aimless (Evans & Murshudov, 2013) from the CCP4 package (Winn et  
693 al., 2011). The structure was solved by molecular replacement (MR) in two steps, using  
694 Phaser (McCoy et al., 2007). First the structure of NrdB $\Delta$ 99 was solved to 1.7  $\text{\AA}$  resolution  
695 using the most homologous structure in the PDB, that of NrdF from *Chlamydia trachomatis*  
696 (1SYY) (Högbom et al., 2004). This structure was rebuilt manually in Coot (Emsley,  
697 Lohkamp, Scott, & Cowtan, 2010) and using Buccaneer (Cowtan, 2006) then refined to  
698 convergence using Refmac5 (Murshudov, Vagin, & Dodson, 1997) and Buster (Bricogne,  
699 2016). Full details of this structure will be presented elsewhere. In the second step, a multi-  
700 body molecular replacement search was carried out using four copies of NrdB $\Delta$ 99 and four  
701 copies of the ATP-cone from *P. aeruginosa* NrdA (Johansson et al., 2016) prepared by side  
702 chain truncation using Chainsaw (Stein, 2008). A single solution was found in which all 8  
703 bodies were placed, with a translation function Z score (TFZ) of 12.2. After rearrangement of  
704 the ATP-cones from the MR solution to the N-termini of their respective core domains, the

705 structure was refined using Refmac5. Some autobuilding was performed using Buccaneer  
706 and manual rebuilding in Coot. Final refinement was done using Buster (Bricogne, 2016).

707 Automatically-generated non-crystallographic symmetry restraints were used. Geometry was  
708 validated using the MolProbity server (Chen et al., 2010).

## 709 Acknowledgements

710 We want to thank Jarone Pinhassi and Sabina Arnautovic, Linneaus University, Kalmar,  
711 Sweden, for the kind gift of *Leeuwenhoekiella blandensis* DNA, Yuliya Leontyeva, Jan-Olov  
712 Persson and Rolf Sundberg, Department of Mathematics, Stockholm University, Sweden, for  
713 excellent statistical analysis of ligand binding, Eva Muñoz and Angel Piñeiro, AFFINmeter,  
714 Santiago de Compostela, Spain for valuable assistance with analysis of ITC titrations, Hanna  
715 Jankevics Jones and John Stenson, Malvern Instruments Ltd, Malvern, UK for highly  
716 appreciated help with protein biophysical characterization and Fredrik Tholander, Karolinska  
717 Institute, Stockholm, Sweden, for generously providing his HPLC instrument for the enzyme  
718 assays. We thank the crystallization facility at Lund Protein Production Platform for  
719 crystallization trials and staff at EMBL Hamburg and ESRF beamlines for assistance with  
720 data collection. This study was supported by grants from the Swedish Cancer Society (CAN  
721 2016/670 to BMS), the Swedish Research Council (2016-01920 to BMS, 2016-04855 to  
722 DTL), the Wenner-Gren Foundations (to BMS) and the Carl Trygger Foundation (to AH).  
723 Work in the laboratory of GB is supported by the Swedish Research Council (621-2014-  
724 5670), the Swedish Research Council for Environment, Agricultural Sciences and Spatial  
725 Planning (213-2014-880) and the European Research Council (714102).

## 726 Accession codes

727 References accessions from Protein Data Bank: 5OLK

## 728 Author contributions

729 IRG, DL, IB, NM, GB, AH, DTL and BMS designed and analyzed experiments. IRG, DL, MH,  
730 VRJ, GB, AH and DTL performed experiments. MC, CL and MS helped with setting up  
731 activity assays. All authors contributed to the final manuscript.

## 732 References

- 733 Ahmad, M. F., & Dealwis, C. G. (2013). The structural basis for the allosteric regulation of  
734 ribonucleotide reductase. *Prog Mol Biol Transl Sci*, 117, 389-410. doi:10.1016/b978-  
735 0-12-386931-9.00014-3
- 736 Andersson, J., Westman, M., Hofer, A., & Sjöberg, B. M. (2000). Allosteric regulation of the  
737 class III anaerobic ribonucleotide reductase from bacteriophage T4. *J Biol Chem*,  
738 275(26), 19443-19448. doi:10.1074/jbc.M001490200
- 739 Ando, N., Brignole, E. J., Zimanyi, C. M., Funk, M. A., Yokoyama, K., Asturias, F. J., . . .  
740 Drennan, C. L. (2011). Structural interconversions modulate activity of Escherichia  
741 coli ribonucleotide reductase. *Proc Natl Acad Sci U S A*, 108(52), 21046-21051.  
742 doi:10.1073/pnas.1112715108



- 743 Ando, N., Li, H., Brignole, E. J., Thompson, S., McLaughlin, M. I., Page, J. E., . . . Drennan,  
744 C. L. (2016). Allosteric inhibition of human ribonucleotide reductase by dATP entails  
745 the stabilization of a hexamer. *Biochemistry*, 55(2), 373-381.  
746 doi:10.1021/acs.biochem.5b01207
- 747 Aravind, L., Wolf, Y. I., & Koonin, E. V. (2000). The ATP-cone: an evolutionarily mobile, ATP-  
748 binding regulatory domain. *J Mol Microbiol Biotechnol*, 2(2), 191-194.
- 749 Aye, Y., & Stubbe, J. (2011). Clofarabine 5'-di and -triphosphates inhibit human  
750 ribonucleotide reductase by altering the quaternary structure of its large subunit. *Proc*  
751 *Natl Acad Sci U S A*, 108(24), 9815-9820. doi:10.1073/pnas.1013274108
- 752 Berggren, G., Lundin, D., & Sjöberg, B.-M. (2017). Homo- and heterometallic dinuclear  
753 manganese proteins: active site assembly. In M. K. Johnson & R. A. Scott (Eds.),  
754 *Metalloprotein Active Site Assembly*: John Wiley & Sons, Ltd.
- 755 Bochner, B. R., & Ames, B. N. (1982). Complete analysis of cellular nucleotides by two-  
756 dimensional thin layer chromatography. *J Biol Chem*, 257(16), 9759-9769.
- 757 Bricogne, G. B., E.; Brandl, M.; Flensburg, C.; Keller, P.; Paciorek, W.; Roversi, P.; Sharff,  
758 A.; Smart, O.S.; Vonrhein, C.; Womack, T.O. (2016). BUSTER version 2.10.2.  
759 *Cambridge, United Kingdom: Global Phasing Ltd.*
- 760 Brown, N. C., & Reichard, P. (1969). Role of effector binding in allosteric control of  
761 ribonucleoside diphosphate reductase. *J Mol Biol*, 46(1), 39-55. doi:0022-  
762 2836(69)90056-4 [pii]
- 763 Buckstein, M. H., He, J., & Rubin, H. (2008). Characterization of nucleotide pools as a  
764 function of physiological state in *Escherichia coli*. *J Bacteriol*, 190(2), 718-726.  
765 doi:10.1128/jb.01020-07
- 766 Chen, V. B., Arendall, W. B., 3rd, Headd, J. J., Keedy, D. A., Immormino, R. M., Kapral, G.  
767 J., . . . Richardson, D. C. (2010). MolProbity: all-atom structure validation for  
768 macromolecular crystallography. *Acta Crystallogr D Biol Crystallogr*, 66(Pt 1), 12-21.  
769 doi:10.1107/s0907444909042073
- 770 Cotruvo, J. A., Jr., Stich, T. A., Britt, R. D., & Stubbe, J. (2013). Mechanism of assembly of  
771 the dimanganese-tyrosyl radical cofactor of class Ib ribonucleotide reductase:  
772 enzymatic generation of superoxide is required for tyrosine oxidation via a  
773 Mn(III)Mn(IV) intermediate. *J Am Chem Soc*, 135(10), 4027-4039.  
774 doi:10.1021/ja312457t
- 775 Cotruvo, J. A., Jr., & Stubbe, J. (2012). Metallation and mismetallation of iron and  
776 manganese proteins in vitro and in vivo: the class I ribonucleotide reductases as a  
777 case study. *Metallomics*, 4(10), 1020-1036. doi:10.1039/c2mt20142a
- 778 Cowtan, K. (2006). The Buccaneer software for automated model building. 1. Tracing protein  
779 chains. *Acta Crystallogr D Biol Crystallogr*, 62(Pt 9), 1002-1011.  
780 doi:10.1107/s0907444906022116
- 781 Crona, M., Avesson, L., Sahlin, M., Lundin, D., Hinas, A., Klose, R., . . . Sjöberg, B. M.  
782 (2013). A rare combination of ribonucleotide reductases in the social amoeba  
783 *Dictyostelium discoideum*. *J Biol Chem*, 288(12), 8198-8208.  
784 doi:10.1074/jbc.M112.442434
- 785 Do, C. B., Mahabhashyam, M. S. P., Brudno, M., & Batzoglou, S. (2005). ProbCons:  
786 Probabilistic consistency-based multiple sequence alignment. *Genome Research*,  
787 15(2), 330-340. doi:10.1101/gr.2821705
- 788 Eddy, S. R. (2011). Accelerated profile HMM searches. *PLoS Comput Biol*, 7(10), e1002195.  
789 doi:10.1371/journal.pcbi.1002195
- 790 Emsley, P., Lohkamp, B., Scott, W. G., & Cowtan, K. (2010). Features and development of  
791 Coot. *Acta Crystallogr D Biol Crystallogr*, 66(Pt 4), 486-501.  
792 doi:10.1107/s0907444910007493
- 793 Eriksson, M., Uhlin, U., Ramaswamy, S., Ekberg, M., Regnström, K., Sjöberg, B. M., &  
794 Eklund, H. (1997). Binding of allosteric effectors to ribonucleotide reductase protein  
795 R1: reduction of active-site cysteines promotes substrate binding. *Structure*, 5(8),  
796 1077-1092.

- 797 Evans, P. R., & Murshudov, G. N. (2013). How good are my data and what is the resolution?  
798 *Acta Crystallogr D Biol Crystallogr*, 69(Pt 7), 1204-1214.  
799 doi:10.1107/s0907444913000061
- 800 Fairman, J. W., Wijerathna, S. R., Ahmad, M. F., Xu, H., Nakano, R., Jha, S., . . . Dealwis, C.  
801 G. (2011). Structural basis for allosteric regulation of human ribonucleotide reductase  
802 by nucleotide-induced oligomerization. *Nat Struct Mol Biol*, 18(3), 316-322.  
803 doi:nsmb.2007 [pii]10.1038/nsmb.2007
- 804 Fernandez-Gomez, B., Richter, M., Schuler, M., Pinhassi, J., Acinas, S. G., Gonzalez, J. M.,  
805 & Pedros-Alio, C. (2013). Ecology of marine Bacteroidetes: a comparative genomics  
806 approach. *ISME J*, 7(5), 1026-1037. doi:10.1038/ismej.2012.169
- 807 Griese, J. J., Srinivas, V., & Högbom, M. (2014). Assembly of nonheme Mn/Fe active sites in  
808 heterodinuclear metalloproteins. *J Biol Inorg Chem*, 19(6), 759-774.  
809 doi:10.1007/s00775-014-1140-7
- 810 Grinberg, I., Shteinberg, T., Gorovitz, B., Aharonowitz, Y., Cohen, G., & Borovok, I. (2006).  
811 The Streptomyces NrdR transcriptional regulator is a Zn ribbon/ATP cone protein that  
812 binds to the promoter regions of class Ia and class II ribonucleotide reductase  
813 operons. *J Bacteriol*, 188(21), 7635-7644. doi:JB.00903-06 [pii]10.1128/JB.00903-06
- 814 Gunasekaran, K., Ma, B., & Nussinov, R. (2004). Is allostery an intrinsic property of all  
815 dynamic proteins? *Proteins*, 57(3), 433-443. doi:10.1002/prot.20232
- 816 Hofer, A., Crona, M., Logan, D. T., & Sjöberg, B. M. (2012). DNA building blocks: keeping  
817 control of manufacture. *Crit Rev Biochem Mol Biol*, 47(1), 50-63.  
818 doi:10.3109/10409238.2011.630372
- 819 Huang, M., Parker, M. J., & Stubbe, J. (2014). Choosing the right metal: case studies of  
820 class I ribonucleotide reductases. *J Biol Chem*, 289(41), 28104-28111.  
821 doi:10.1074/jbc.R114.596684
- 822 Högbom, M., Stenmark, P., Voevodskaya, N., McClarty, G., Gräslund, A., & Nordlund, P.  
823 (2004). The radical site in chlamydial ribonucleotide reductase defines a new R2  
824 subclass. *Science*, 305(5681), 245-248. doi:10.1126/science.1098419
- 825 Johansson, R., Jonna, V. R., Kumar, R., Nayeri, N., Lundin, D., Sjöberg, B. M., . . . Logan,  
826 D. T. (2016). Structural mechanism of allosteric activity regulation in a ribonucleotide  
827 reductase with double ATP cones. *Structure*, 24(6), 906-917.  
828 doi:10.1016/j.str.2016.03.025
- 829 Jonna, V. R., Crona, M., Rofougaran, R., Lundin, D., Johansson, S., Brännström, K., . . .  
830 Hofer, A. (2015). Diversity in overall activity regulation of ribonucleotide reductase. *J*  
831 *Biol Chem*, 290(28), 17339-17348. doi:10.1074/jbc.M115.649624
- 832 Kabsch, W. (2010). XDS. *Acta Crystallogr D Biol Crystallogr*, 66(Pt 2), 125-132.  
833 doi:10.1107/s0907444909047337
- 834 Kashlan, O. B., Scott, C. P., Lear, J. D., & Cooperman, B. S. (2002). A comprehensive  
835 model for the allosteric regulation of mammalian ribonucleotide reductase. Functional  
836 consequences of ATP- and dATP-induced oligomerization of the large subunit.  
837 *Biochemistry*, 41(2), 462-474. doi:10.1021/bi011653a
- 838 Kaufman, S. L., Skogen, J. W., Dorman, F. D., Zarrin, F., & Lewis, K. C. (1996).  
839 Macromolecule analysis based on electrophoretic mobility in air: globular proteins.  
840 *Anal Chem*, 68(11), 1895-1904. doi:10.1021/ac951128f
- 841 Kumar, D., Abdulovic, A. L., Viberg, J., Nilsson, A. K., Kunkel, T. A., & Chabes, A. (2011).  
842 Mechanisms of mutagenesis in vivo due to imbalanced dNTP pools. *Nucleic Acids*  
843 *Res*, 39(4), 1360-1371. doi:10.1093/nar/gkq829
- 844 Larsson, K. M., Jordan, A., Eliasson, R., Reichard, P., Logan, D. T., & Nordlund, P. (2004).  
845 Structural mechanism of allosteric substrate specificity regulation in a ribonucleotide  
846 reductase. *Nat Struct Mol Biol*, 11(11), 1142-1149. doi:10.1038/nsmb838
- 847 Lundin, D., Berggren, G., Logan, D. T., & Sjöberg, B. M. (2015). The origin and evolution of  
848 ribonucleotide reduction. *Life (Basel)*, 5(1), 604-636. doi:10.3390/life5010604
- 849 Mathews, C. K. (2006). DNA precursor metabolism and genomic stability. *FASEB J*, 20(9),  
850 1300-1314. doi:20/9/1300 [pii]10.1096/fj.06-5730rev

- 851 Mathews, C. K. (2014). Deoxyribonucleotides as genetic and metabolic regulators. *FASEB J*,  
852 28(9), 3832-3840. doi:10.1096/fj.14-251249
- 853 McCoy, A. J., Grosse-Kunstleve, R. W., Adams, P. D., Winn, M. D., Storoni, L. C., & Read,  
854 R. J. (2007). Phaser crystallographic software. *J Appl Crystallogr*, 40(Pt 4), 658-674.  
855 doi:10.1107/s0021889807021206
- 856 McKethan, B. L., & Spiro, S. (2013). Cooperative and allosterically controlled nucleotide  
857 binding regulates the DNA binding activity of NrdR. *Mol Microbiol*, 90(2), 278-289.  
858 doi:10.1111/mmi.12364
- 859 Murshudov, G. N., Vagin, A. A., & Dodson, E. J. (1997). Refinement of macromolecular  
860 structures by the maximum-likelihood method. *Acta Crystallogr D Biol Crystallogr*,  
861 53(Pt 3), 240-255. doi:10.1107/s0907444996012255
- 862 Nordlund, P., & Reichard, P. (2006). Ribonucleotide reductases. *Annu Rev Biochem*, 75,  
863 681-706. doi:10.1146/annurev.biochem.75.103004.142443
- 864 Nussinov, R., & Tsai, C. J. (2013). Allostery in disease and in drug discovery. *Cell*, 153(2),  
865 293-305. doi:10.1016/j.cell.2013.03.034
- 866 Pai, C. C., & Kearsley, S. E. (2017). A critical balance: dNTPs and the maintenance of  
867 genome stability. *Genes (Basel)*, 8(2). doi:10.3390/genes8020057
- 868 Pinhassi, J., Bowman, J. P., Nedashkovskaya, O. I., Lekunberri, I., Gomez-Consarnau, L., &  
869 Pedros-Alio, C. (2006). *Leeuwenhoekia* blandensis sp. nov., a genome-sequenced  
870 marine member of the family Flavobacteriaceae. *Int J Syst Evol Microbiol*, 56(Pt 7),  
871 1489-1493. doi:10.1099/ijs.0.64232-0
- 872 Price, M. N., Dehal, P. S., & Arkin, A. P. (2010). FastTree 2 – approximately maximum-  
873 likelihood trees for large alignments. *PLoS One*, 5(3), e9490.  
874 doi:10.1371/journal.pone.0009490
- 875 Reichard, P. (2010). Ribonucleotide reductases: substrate specificity by allostery. *Biochem*  
876 *Biophys Res Commun*, 396(1), 19-23. doi:10.1016/j.bbrc.2010.02.108
- 877 Rofougaran, R., Crona, M., Vodnala, M., Sjöberg, B.-M., & Hofer, A. (2008). Oligomerization  
878 status directs overall activity regulation of the Escherichia coli class Ia ribonucleotide  
879 reductase. *J Biol Chem*, 283(51), 35310-35318. doi:10.1074/jbc.M806738200
- 880 Rofougaran, R., Vodnala, M., & Hofer, A. (2006). Enzymatically active mammalian  
881 ribonucleotide reductase exists primarily as an alpha6beta2 octamer. *J Biol Chem*,  
882 281(38), 27705-27711. doi:10.1074/jbc.M605573200 [pii]10.1074/jbc.M605573200
- 883 Rognes, T., Flouri, T., Nichols, B., Quince, C., & Mahe, F. (2016). VSEARCH: a versatile  
884 open source tool for metagenomics. *PeerJ*, 4, e2584. doi:10.7717/peerj.2584
- 885 Roos, K., & Siegbahn, P. E. (2011). Oxygen cleavage with manganese and iron in  
886 ribonucleotide reductase from Chlamydia trachomatis. *J Biol Inorg Chem*, 16(4), 553-  
887 565. doi:10.1007/s00775-011-0755-1
- 888 Stein, N. (2008). CHAINSAW: a program for mutating pdb files used as templates in  
889 molecular replacement. *J Appl Cryst*, 41, 641-643.
- 890 Swain, J. F., & Gierasch, L. M. (2006). The changing landscape of protein allostery. *Curr*  
891 *Opin Struct Biol*, 16(1), 102-108. doi:10.1016/j.sbi.2006.01.003
- 892 Thelander, L., & Reichard, P. (1979). Reduction of ribonucleotides. *Annu Rev Biochem*, 48,  
893 133-158. doi:10.1146/annurev.bi.48.070179.001025
- 894 Torrents, E. (2014). Ribonucleotide reductases: essential enzymes for bacterial life. *Front*  
895 *Cell Infect Microbiol*, 4, 52. doi:10.3389/fcimb.2014.00052
- 896 Torrents, E., Buist, G., Liu, A., Eliasson, R., Kok, J., Gibert, I., . . . Reichard, P. (2000). The  
897 anaerobic (class III) ribonucleotide reductase from Lactococcus lactis. Catalytic  
898 properties and allosteric regulation of the pure enzyme system. *J Biol Chem*, 275(4),  
899 2463-2471.
- 900 Torrents, E., Westman, M., Sahlin, M., & Sjöberg, B. M. (2006). Ribonucleotide reductase  
901 modularity: atypical duplication of the ATP-cone domain in Pseudomonas  
902 aeruginosa. *J Biol Chem*, 281(35), 25287-25296. doi:10.1074/jbc.M601794200  
903 [pii]10.1074/jbc.M601794200
- 904 Traut, T. W. (1994). Physiological concentrations of purines and pyrimidines. *Mol Cell*  
905 *Biochem*, 140(1), 1-22.

- 906 Watt, D. L., Buckland, R. J., Lujan, S. A., Kunkel, T. A., & Chabes, A. (2016). Genome-wide  
907 analysis of the specificity and mechanisms of replication infidelity driven by  
908 imbalanced dNTP pools. *Nucleic Acids Res*, *44*(4), 1669-1680.  
909 doi:10.1093/nar/gkv1298
- 910 Winn, M. D., Ballard, C. C., Cowtan, K. D., Dodson, E. J., Emsley, P., Evans, P. R., . . .  
911 Wilson, K. S. (2011). Overview of the CCP4 suite and current developments. *Acta*  
912 *Crystallogr D Biol Crystallogr*, *67*(Pt 4), 235-242. doi:10.1107/s0907444910045749
- 913 Zheng, M., Khangulov, S. V., Dismukes, G. C., & Barynin, V. V. (1994). Electronic structure  
914 of dimanganese(II,III) and dimanganese(III,IV) complexes and dimanganese catalase  
915 enzyme - a general EPR spectral simulation approach. *Inorg Chem*, *33*(2), 382-387.  
916 doi:10.1021/ic00080a030
- 917 Zimanyi, C. M., Chen, P. Y., Kang, G., Funk, M. A., & Drennan, C. L. (2016). Molecular basis  
918 for allosteric specificity regulation in class Ia ribonucleotide reductase from  
919 *Escherichia coli*. *Elife*, *5*, e07141. doi:10.7554/eLife.07141
- 920
